# Supplementary material for: Design, Synthesis, In Vivo, and In Silico Evaluation of Benzothiazoles Bearing a 1,3,4-Oxadiazole Moiety as New Antiepileptic Agents
Source: PubMed Central journal article supplement — ACS Omega. 2023 Jan 5;8(2):2520–30. doi: 10.1021/acsomega.2c06967 (PMC9851031; doi:10.1021/acsomega.2c06967), 2023-01-05
Supplement: ao2c06967_si_001.pdf [file ao2c06967_si_001.pdf]

## **Design, Synthesis, *In Vivo* and *In Silico* Evaluation of Benzothiazoles Bearing 1,3,4-Oxadiazole Moiety as New Antiepileptic Agents**

Bharti Chauhan<sup>1</sup>, Rajnish Kumar<sup>\*1</sup>, Salahuddin<sup>1</sup>, Himanshu Singh<sup>1</sup>, Obaid Afzal<sup>2</sup>, Abdulmalik Saleh Alfawaz Altamimi<sup>2</sup>, Mohd. Mustaqeem Abdullah<sup>3</sup>, Mohammad Shahar Yar<sup>4</sup>, Mohamed Jawed Ahsan<sup>5</sup>,  
Neeraj Kumar<sup>6</sup>, Sanjay Kumar Yadav<sup>1</sup>

<sup>1</sup>Noida Institute of Engineering and Technology (Pharmacy Institute), Greater Noida, India

<sup>2</sup>Department of Pharmaceutical Chemistry, College of Pharmacy, Prince Sattam Bin Abdulaziz University, Al-Kharj 11942, Saudi Arabia.

<sup>3</sup>ANA Institute of Pharmaceutical Sciences and Research, Bareilly-243501, India

<sup>4</sup>Department of Pharmaceutical Chemistry, School of Pharmaceutical Education and Research, Jamia Hamdard, New Delhi, India;

<sup>5</sup>Department of Pharmaceutical Chemistry, Maharishi Arvind College of Pharmacy, Ambabari Circle, Jaipur, Rajasthan, India

<sup>6</sup>Dr. R M L Institute of Pharmacy Powayan Shahjahanpur, Uttar Pradesh, India

### **Supporting Information**

#### **Spectral Data**

##### **5-benzothiazol-2-yl-2-methoxy-phenol (3)**

Yield 70%, m.p. 160-170°C. IR (KBr),  $V_{max}$  (cm<sup>-1</sup>): 3244 (str, OH), 3065 (str, C-H, Ar), 2932-2845 (str, C-H, alkane), 1586 (str, C=N), 1530-1431 (C=C, Ar), 1174 (C-O), 1127(C-N), 731 (C-S-C); <sup>1</sup>H NMR (CDCl<sub>3</sub>) (300 MHz):  $\delta$  (ppm) = 8.032-8.003 (J= 8.7 Hz, d, 2H, benzothiazolyl), 7.493-7.436 (J=17.1 Hz, t, 1H, benzothiazolyl), 7.372-7.320 (J= 15.6 Hz, t, 1H, benzothiazolyl), 6.978-6.952 (J= 7.8 Hz, d, 2H, Ar), 6.078 (s, 1H, Ar), 5.002 (s, 1H, OH), 3.738 (s, 3H, -OCH<sub>3</sub>); <sup>13</sup>C NMR:  $\delta$  (ppm) = 168.42 (N=C-S), 149.01 (=C-O), 134.01-116.20 (11C, Ar), 56.29 (OCH<sub>3</sub>); EI-MS (m/z): 257 (M<sup>+</sup>); Anal. calcd. for C<sub>14</sub>H<sub>11</sub>NO<sub>2</sub>S: C, 65.35; H, 4.31; N, 5.44; O, 12.44; S, 12.46. Found: C, 65.65; H, 4.01; N, 5.24; O, 12.14; S, 12.66.

##### **3.1.3. (5-benzothiazol-2-yl-2-methoxy-phenoxy)-acetic acid ethyl ester (4)**

Yield 69%, m.p. 160-165°C. IR (KBr),  $V_{max}$  (cm<sup>-1</sup>): 3064 (str, C-H, Ar), 2935-2849 (str, C-H, alkane), 1763 (str, C=O), 1586 (str, C=N), 1523-1432 (C=C, Ar), 1193 (C-O), 1136 (C-N), 727 (C-S-C); <sup>1</sup>H NMR (CDCl<sub>3</sub>) (300 MHz):  $\delta$  (ppm) = 8.023-7.993 (J= 9 Hz, d, 2H, benzothiazolyl), 7.492-7.434 (J=17.4 Hz, t, 1H, benzothiazolyl), 7.371-7.320 (J= 15.3 Hz, t, 1H, benzothiazolyl), 6.980-6.950 (J= 9 Hz, d, 2H, Ar), 6.088 (s, 1H, Ar), 4.090 (s, 2H, -CH<sub>2</sub>-), 4.014 (q, 4H, -CH<sub>2</sub>-), 3.736 (s, 3H, -OCH<sub>3</sub>), 1.252 (s, 3H, -CH<sub>3</sub>); <sup>13</sup>C NMR:  $\delta$  (ppm) = 169.02 (C=O), 168.92 (N=C-S), 152.32 (=C-O), 140.12-113.21 (10C, Ar), 77.23 (-

CH<sub>2</sub>-), 58.22 (OCH<sub>3</sub>), 14.28 (CH<sub>3</sub>); EI-MS (m/z): 343 (M<sup>+</sup>); Anal. calcd. for C<sub>18</sub>H<sub>17</sub>NO<sub>4</sub>S: C, 62.96; H, 4.99; N, 4.08; O, 18.64; S, 9.34. Found: C, 62.76; H, 4.74; N, 4.16; O, 18.85; S, 9.54.

### 3.1.4. (5-benzothiazol-2-yl-2-methoxy-phenoxy)-acetic acid hydrazide (5)

Yield 72%, m.p. 170- 175°C. IR (KBr), V<sub>max</sub> (cm<sup>-1</sup>): 3648 (str, N-H), 3065 (str, C-H, Ar), 2932-2849 (str, C-H, alkane), 1757 (str, C=O), 1558 (str, C=N), 1554-1435 (C=C, Ar), 1173 (C-O), 1146 (C-N), 729 (C-S-C); <sup>1</sup>H NMR (CDCl<sub>3</sub>) (300 MHz): δ (ppm) = 8.023-7.994 (J=8.7 Hz, d, 2H, benzothiazolyl), 7.489-7.431 (J= 17.4 Hz, t, 1H, benzothiazolyl), 7.371-7.320 (J=15.3 Hz, t, 1H, benzothiazolyl), 7.265 (s, 1H, NH), 6.979-6.949 (J= 9 Hz, d, 2H, Ar), 6.087 (s, 1H, Ar), 4.089 (s, 2H, -CH<sub>2</sub>-), 3.736 (s, 3H, OCH<sub>3</sub>), 1.981 (s, 2H, NH<sub>2</sub>); <sup>13</sup>C NMR: δ (ppm) = 169.03 (C=O), 168.93 (N=C-S), 152.31 (=C-O), 140.10-113.20 (11C, Ar), 77.22 (-CH<sub>2</sub>-), 58.21 (OCH<sub>3</sub>); EI-MS (m/z): 329 (M<sup>+</sup>); Anal. calcd. for C<sub>16</sub>H<sub>15</sub>N<sub>3</sub>O<sub>3</sub>S: C, 58.34; H, 4.59; N, 12.76; O, 14.57; S, 9.74. Found: C, 58.04; H, 4.69; N, 12.94; O, 14.65; S, 9.56.

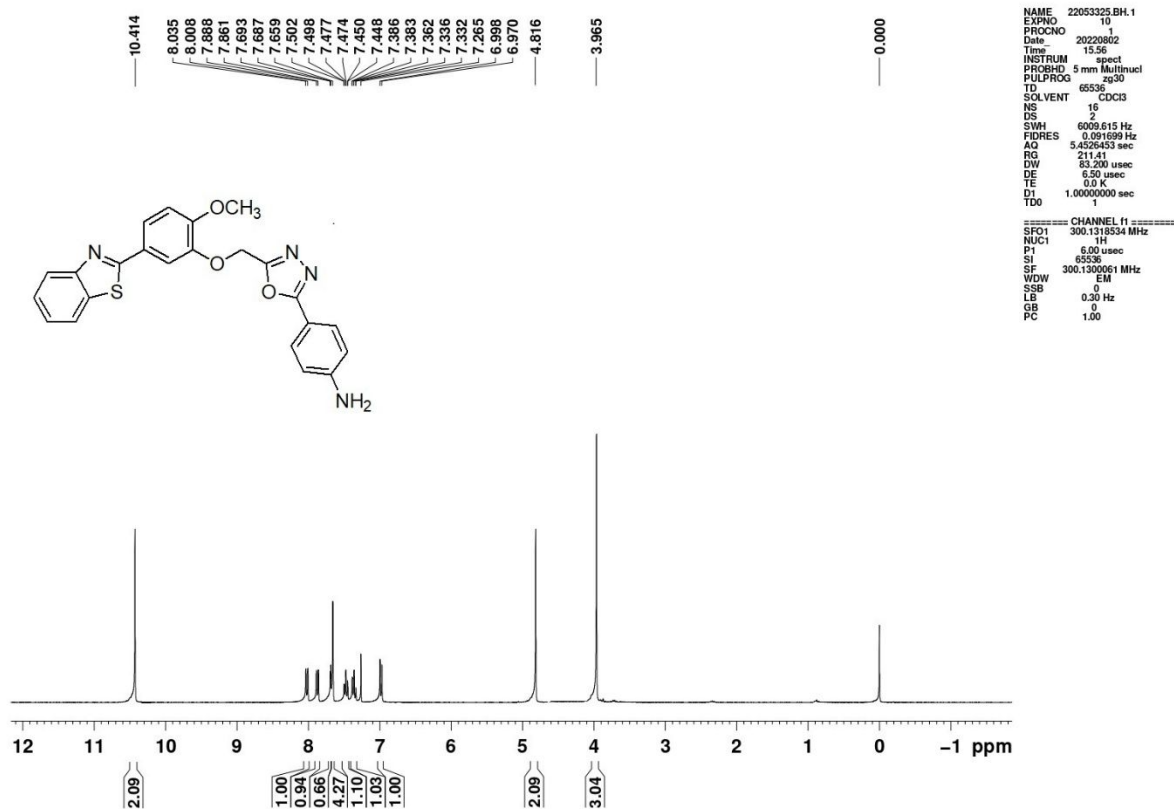

Figure 1: <sup>1</sup>H-NMR spectra of compound 6a

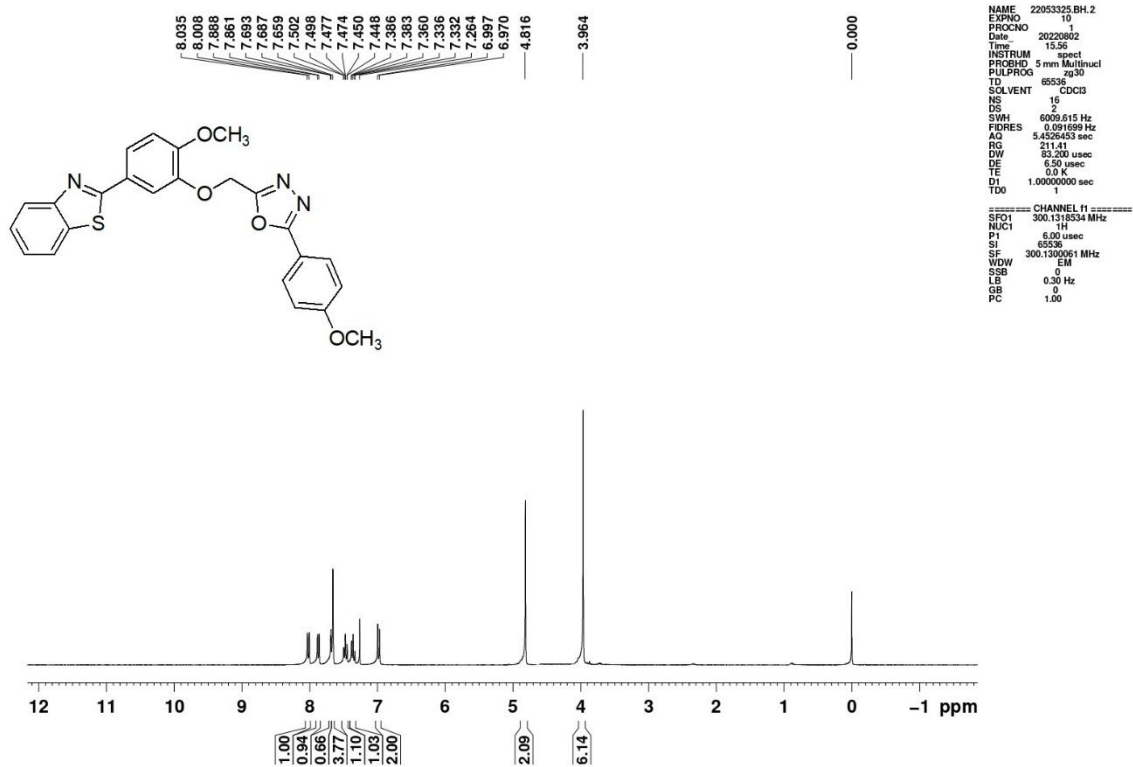

Figure 2: <sup>1</sup>H-NMR spectra of compound **6b**

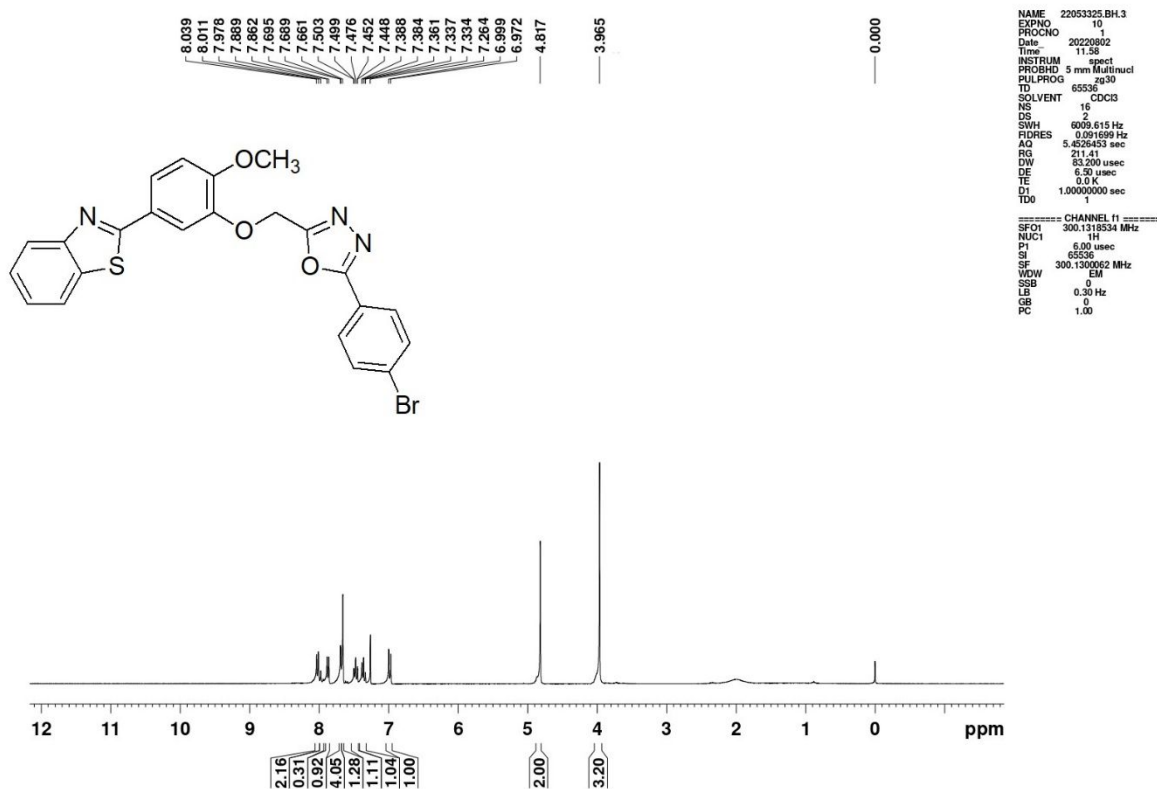

Figure 3: <sup>1</sup>H-NMR spectra of compound 6c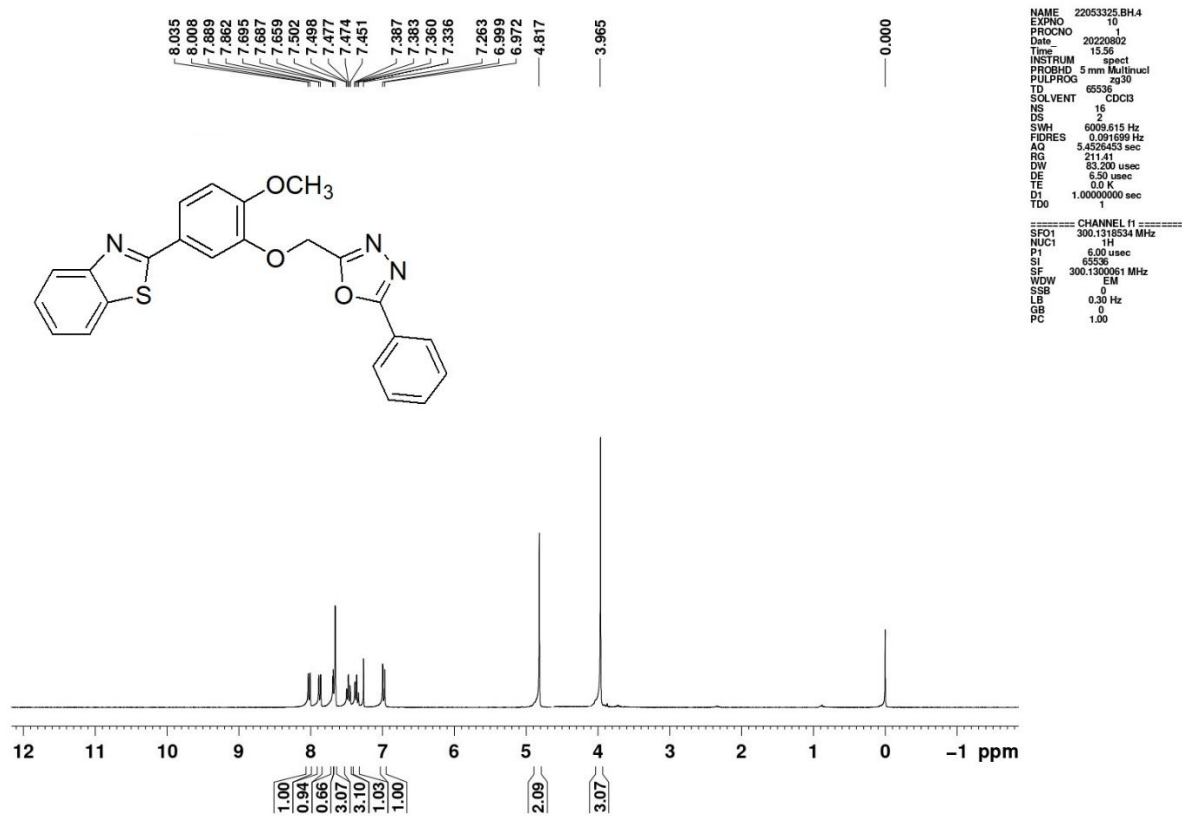Figure 4: <sup>1</sup>H-NMR spectra of compound 6d

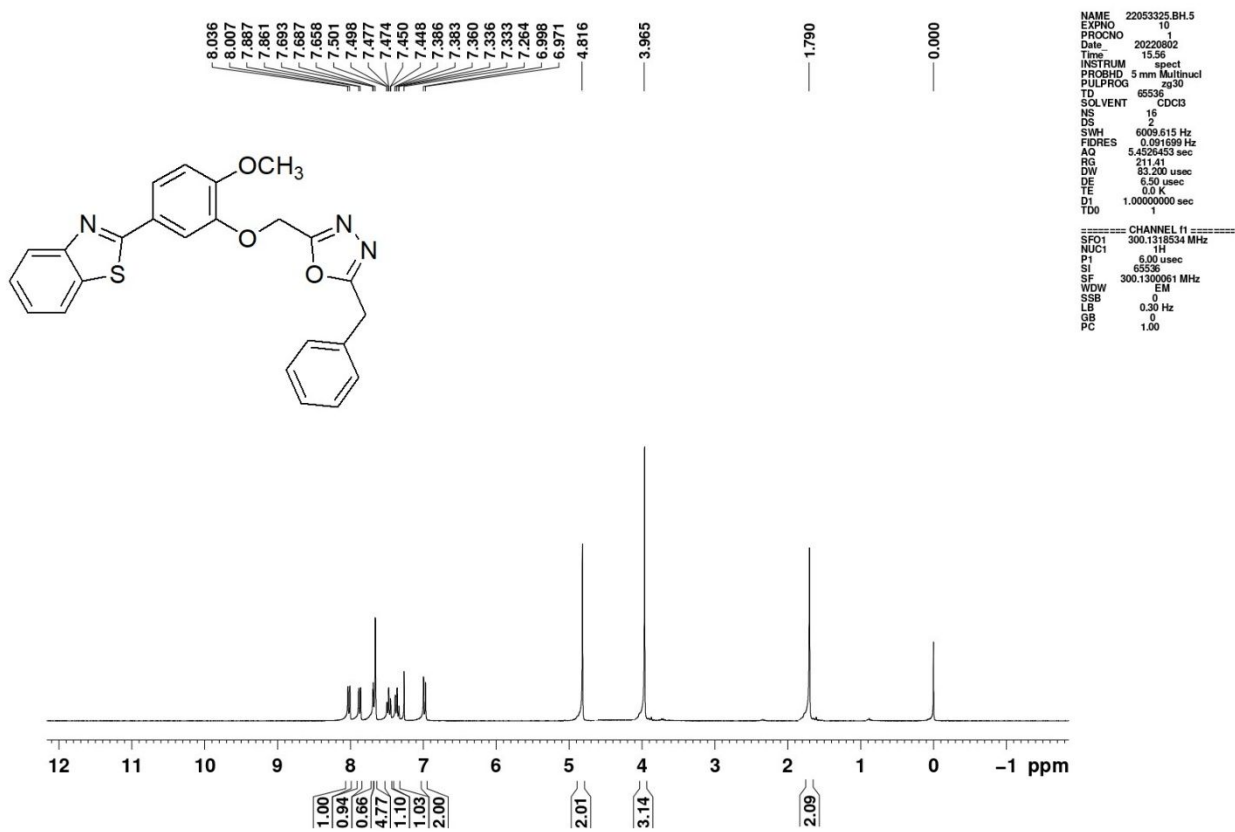

Figure 5: <sup>1</sup>H-NMR spectra of compound 6e

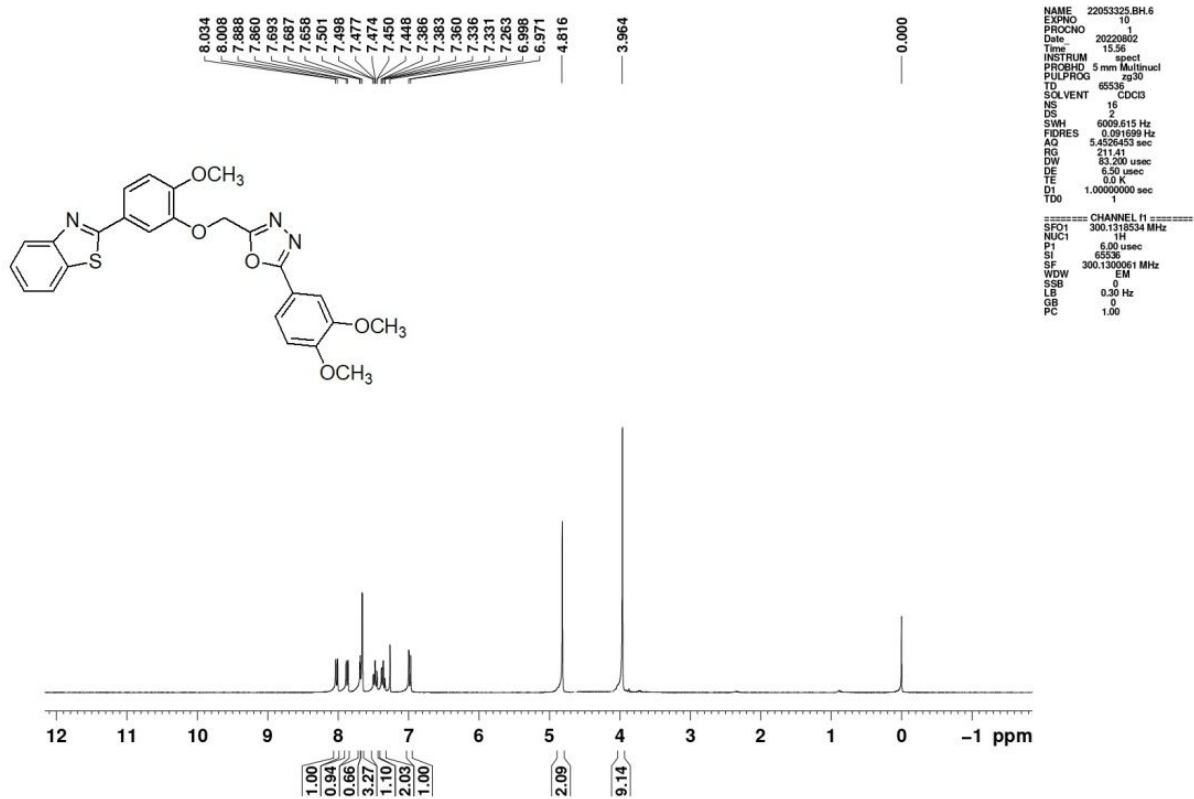Figure 6: <sup>1</sup>H-NMR spectra of compound 6f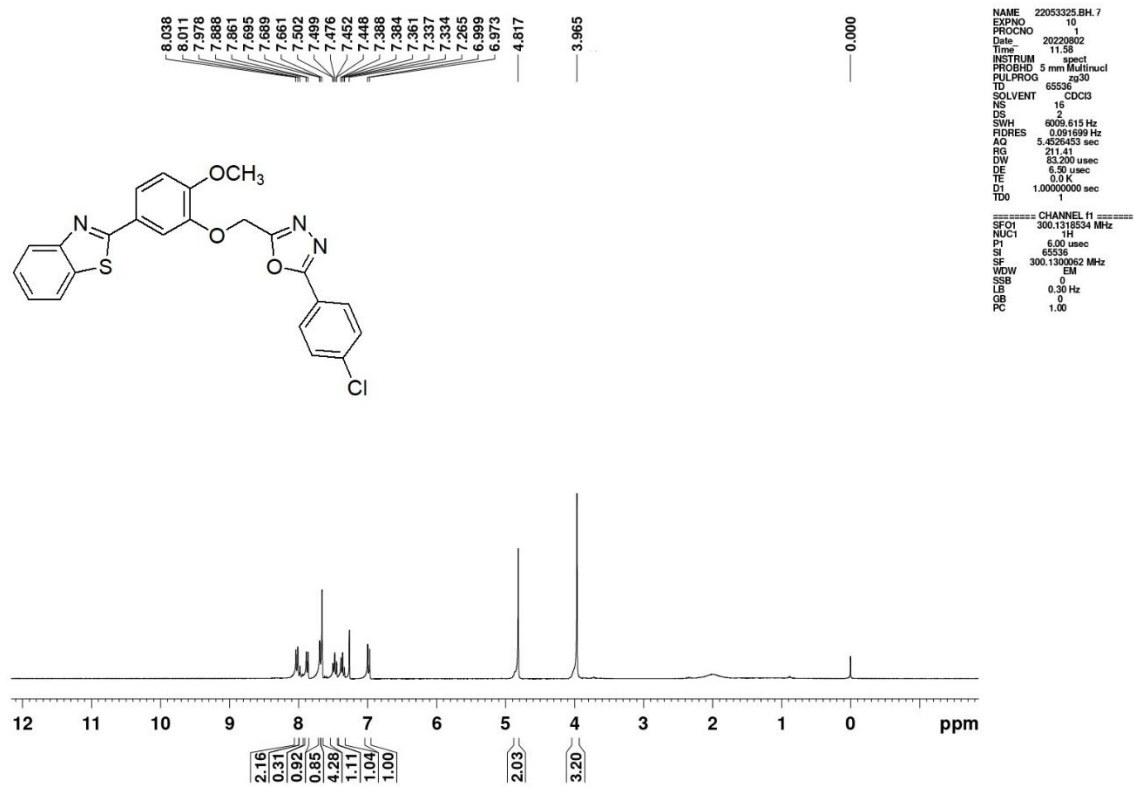

Figure 7: <sup>1</sup>H-NMR spectra of compound **6g**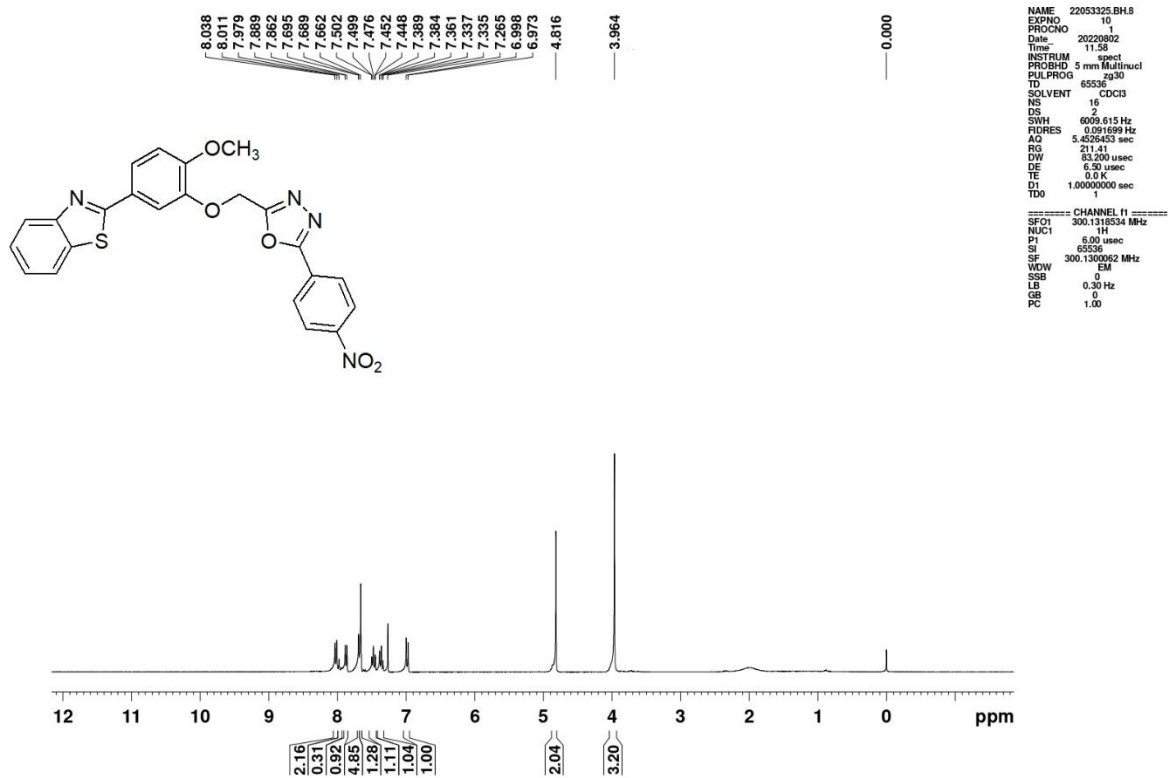Figure 8: <sup>1</sup>H-NMR spectra of compound **6h**

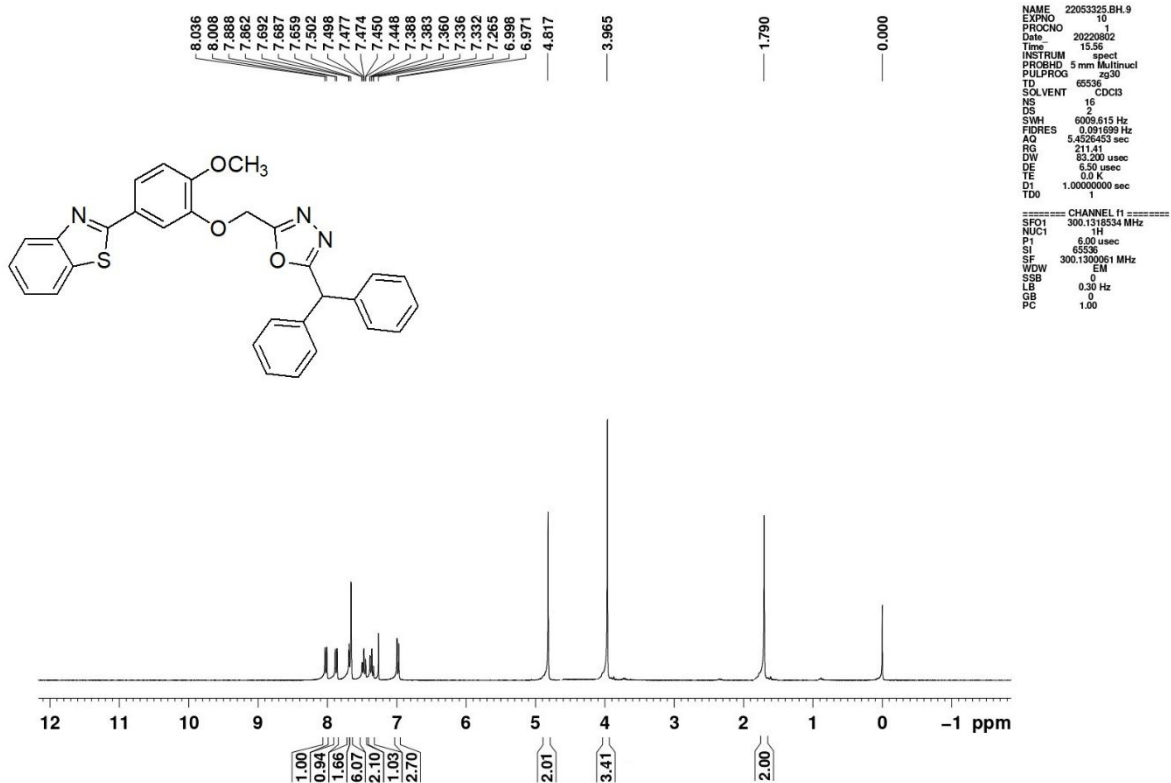Figure 9: <sup>1</sup>H-NMR spectra of compound 6i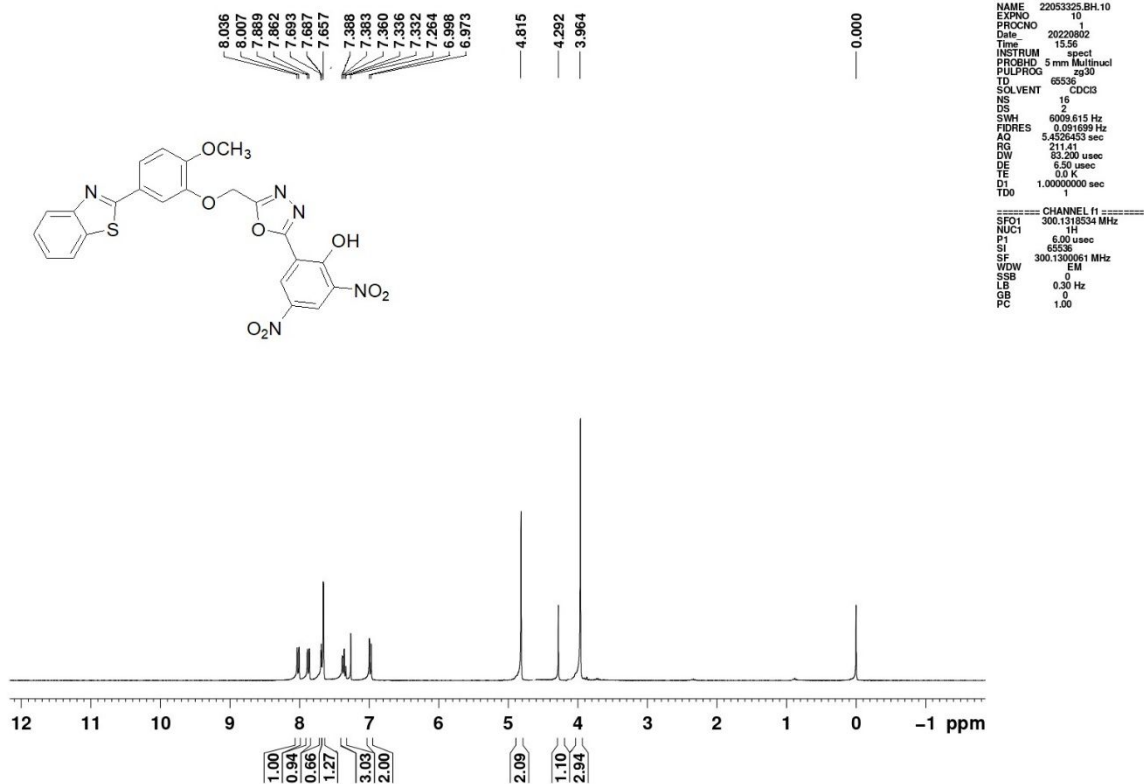



Figure 10:  $^1\text{H-NMR}$  spectra of compound 6j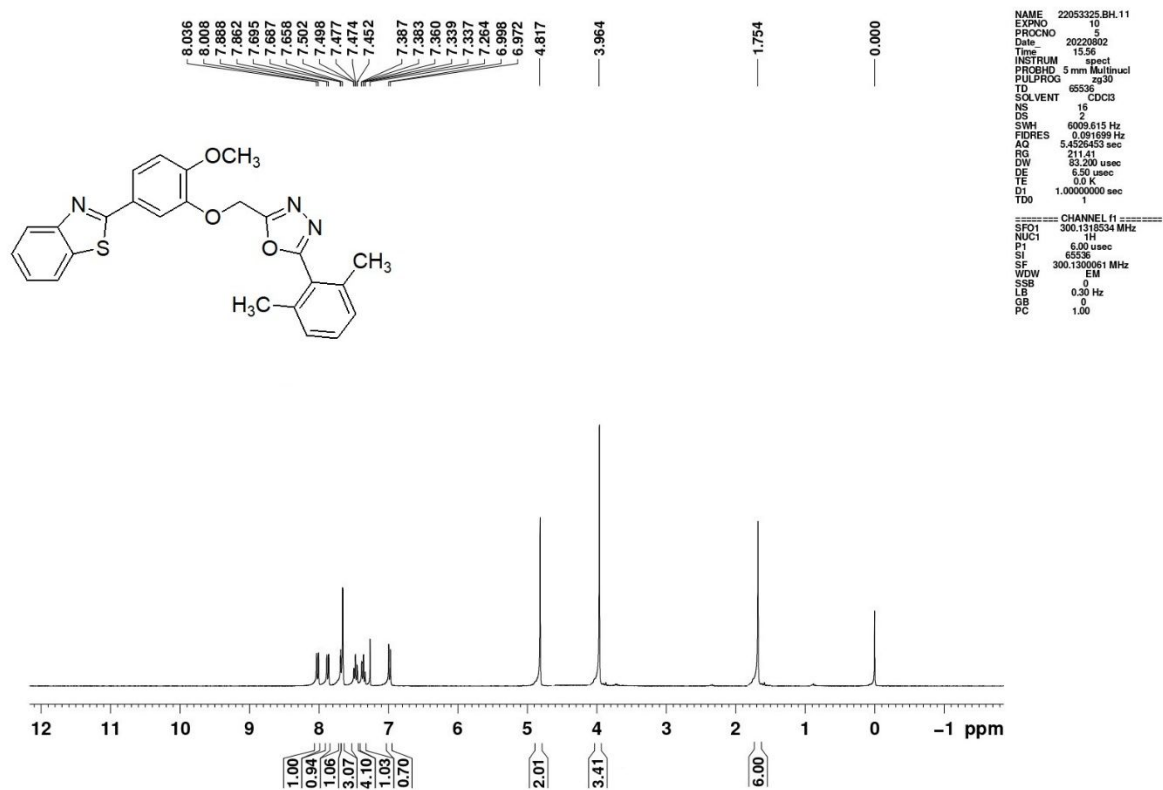

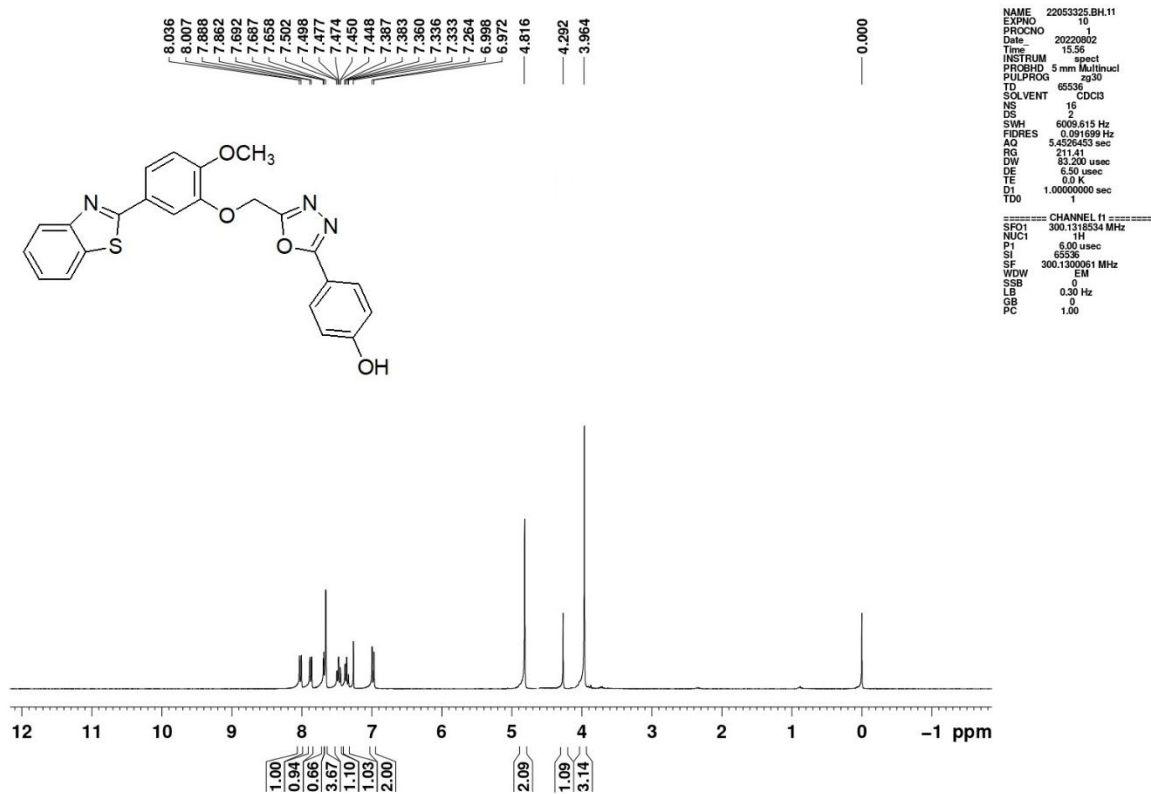Figure 12: <sup>1</sup>H-NMR spectra of compound **6l**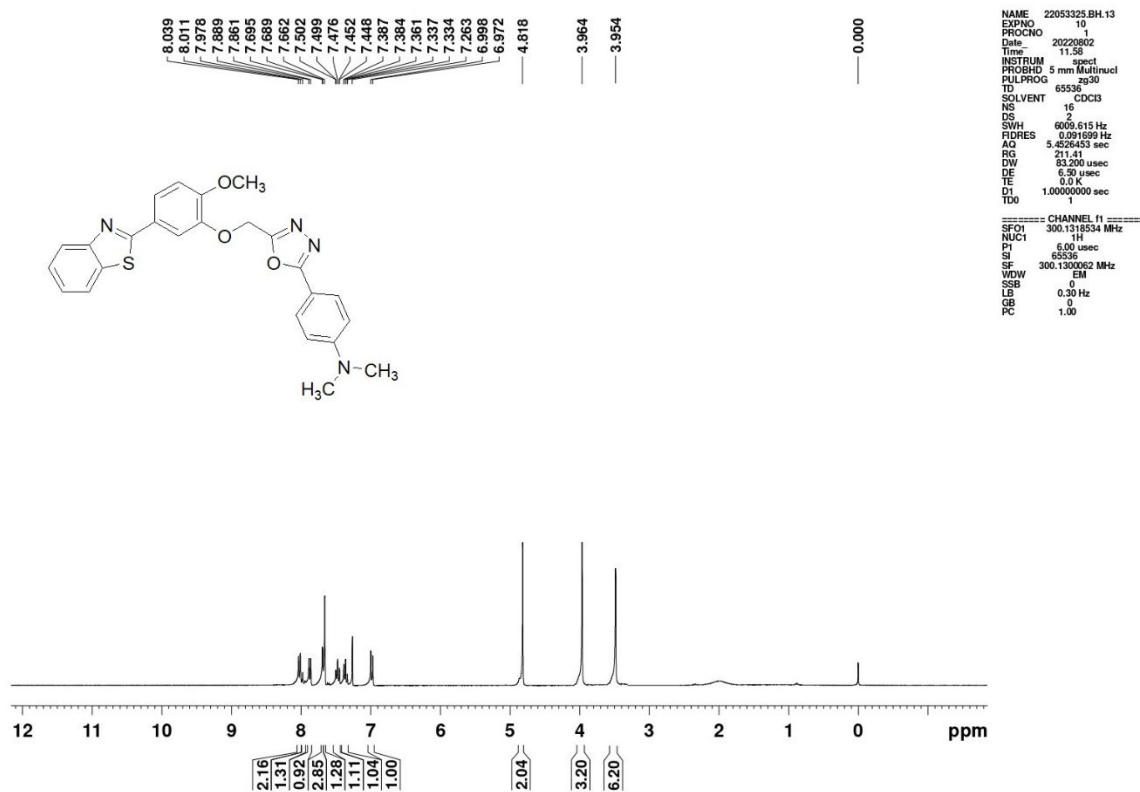

Figure 13:  $^1\text{H-NMR}$  spectra of compound 6m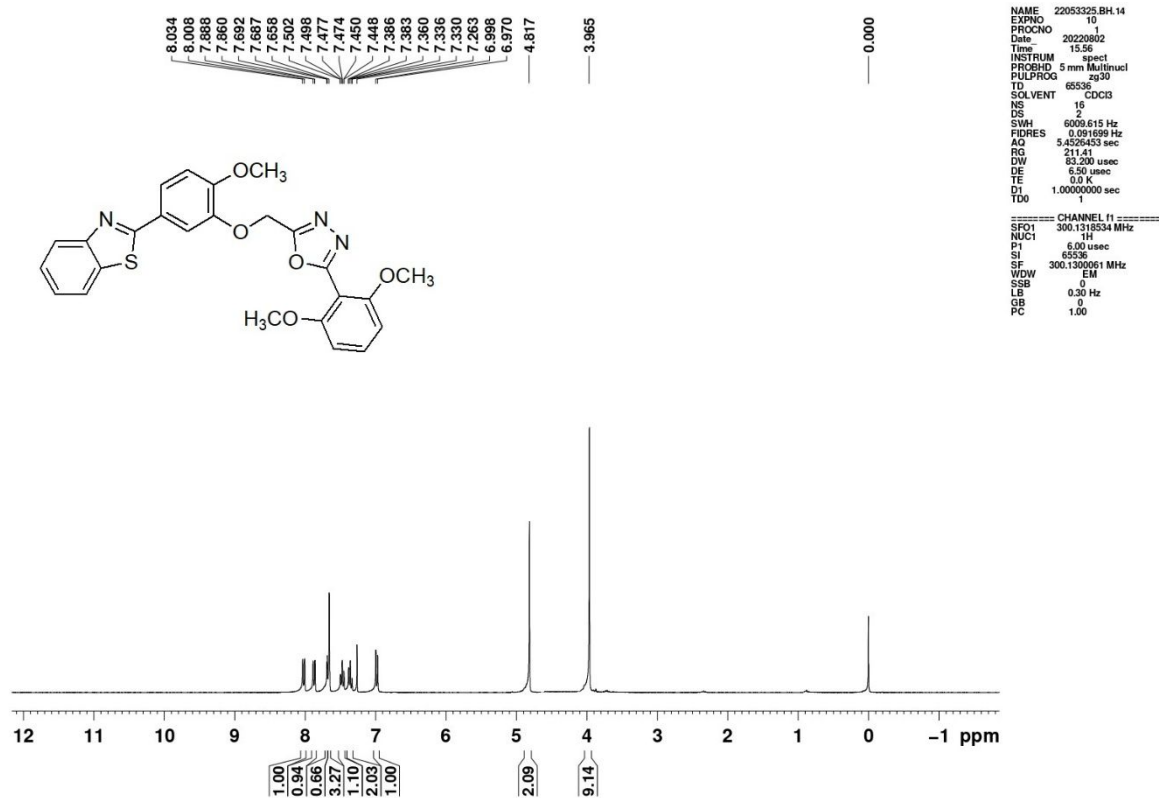Figure 14:  $^1\text{H-NMR}$  spectra of compound 6n

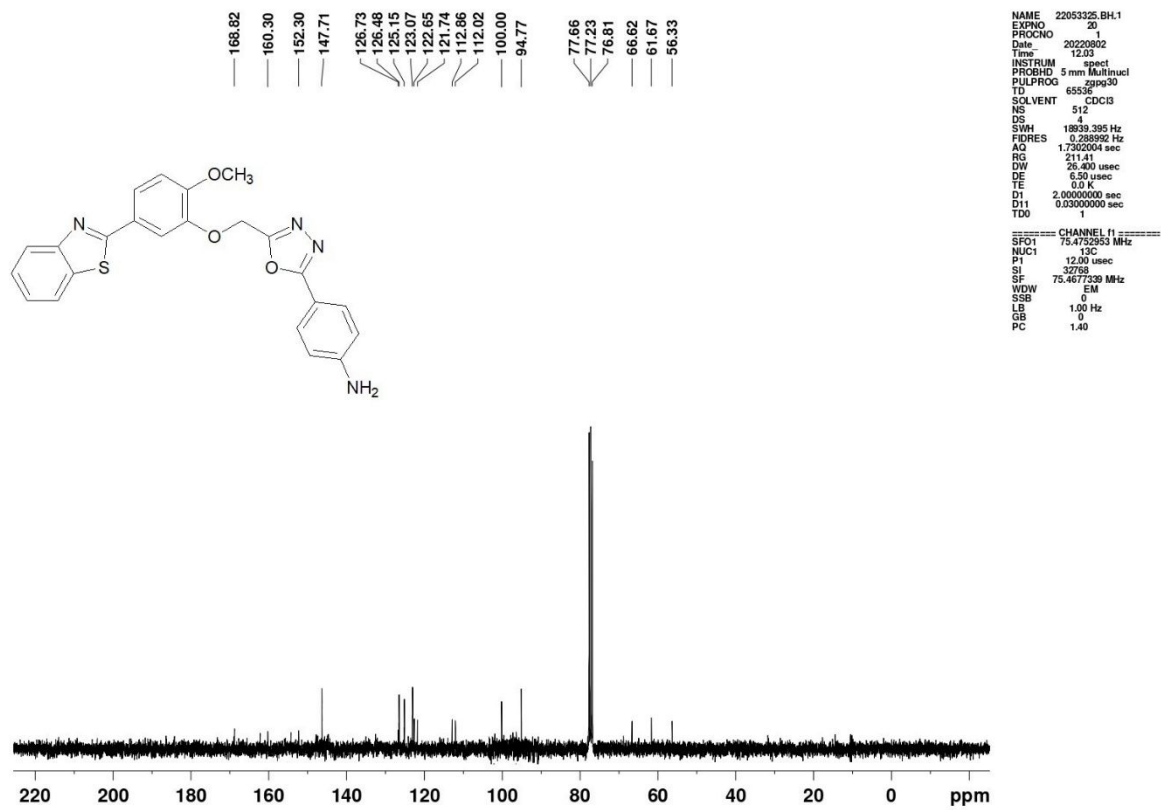Figure 15:  $^{13}\text{C}$ -NMR spectra of compound 6a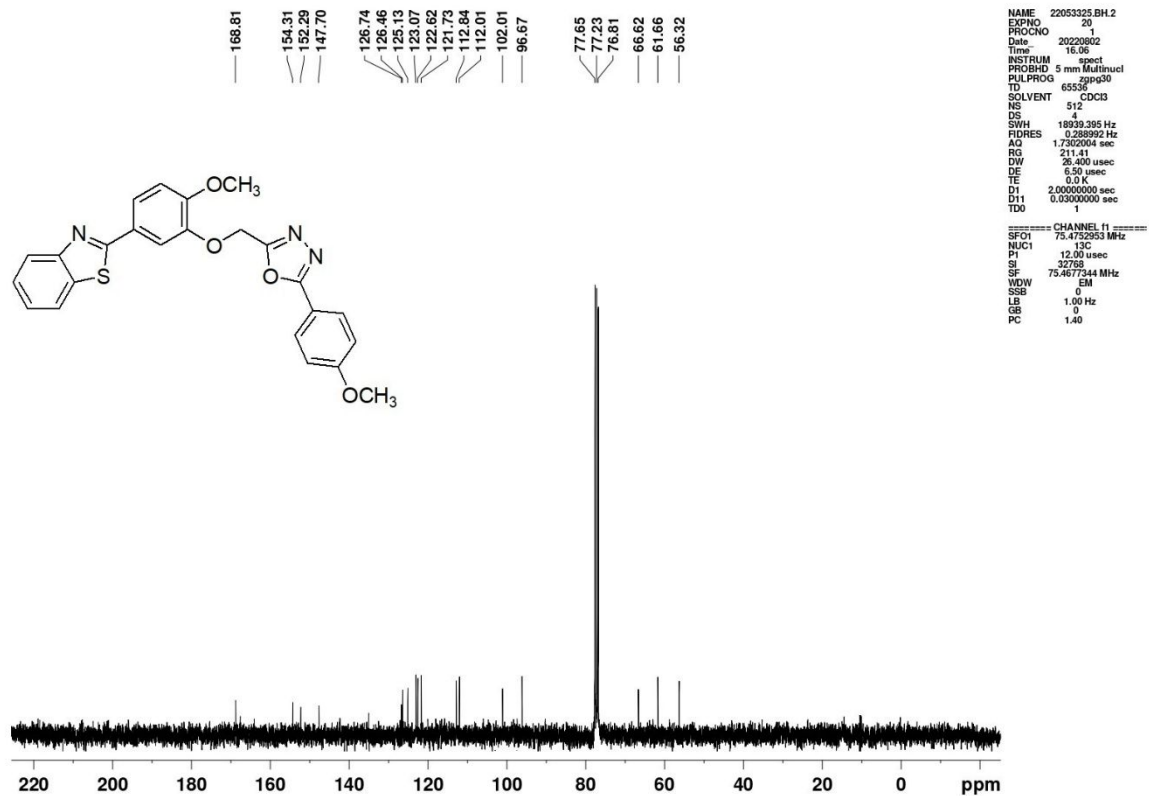

Figure 16:  $^{13}\text{C}$ -NMR spectra of compound **6b**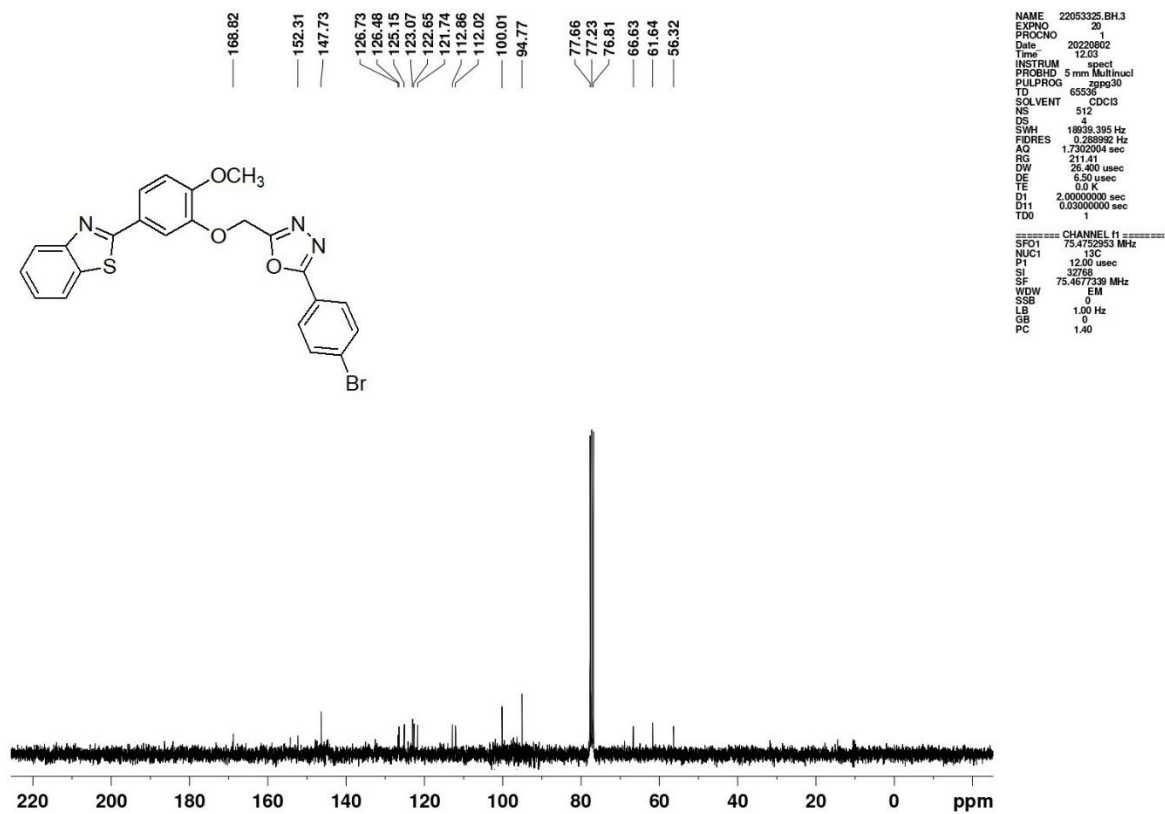Figure 17:  $^{13}\text{C}$ -NMR spectra of compound **6c**

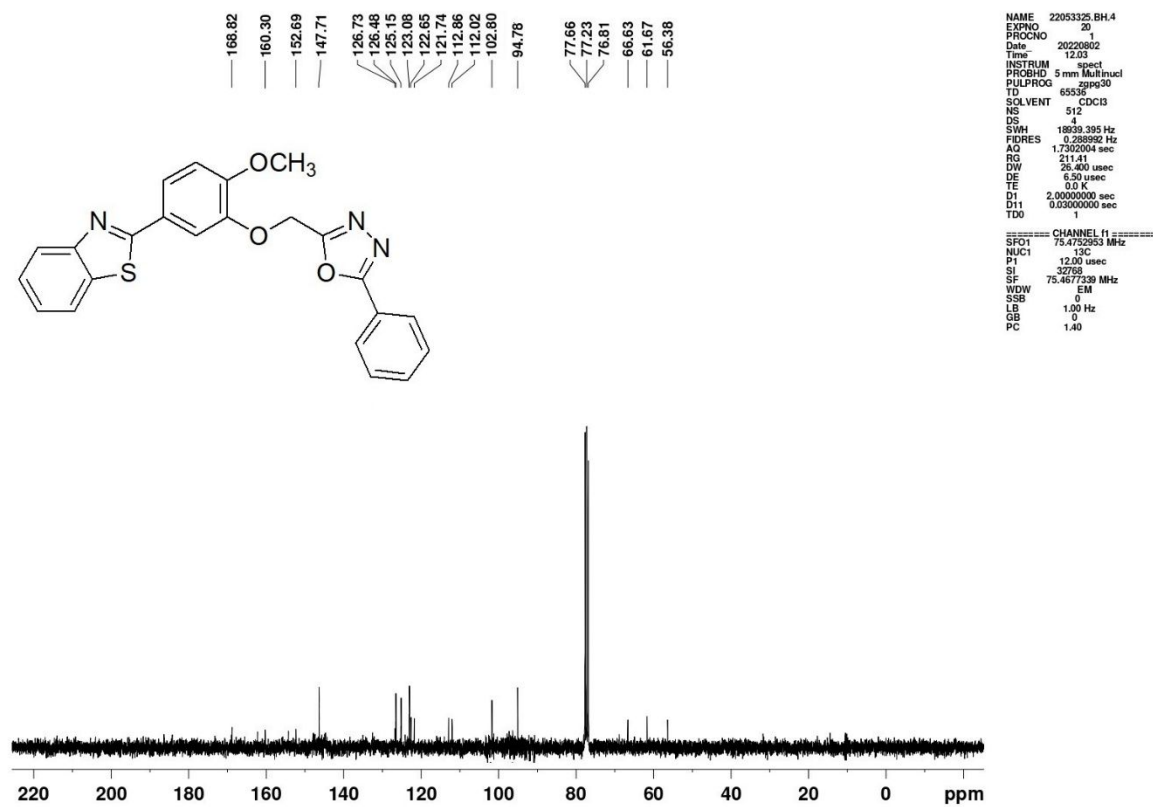

Figure 18: <sup>13</sup>C-NMR spectra of compound 6d

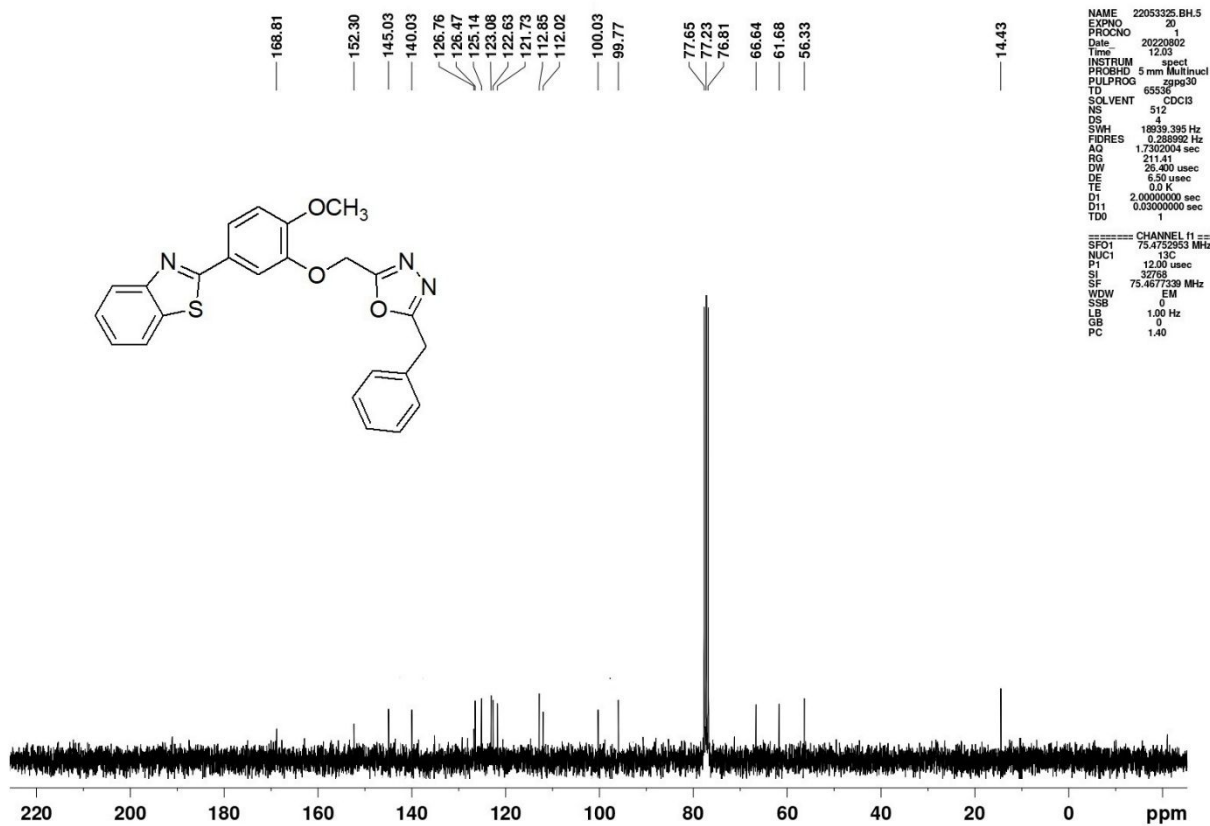Figure 19: <sup>13</sup>C-NMR spectra of compound 6c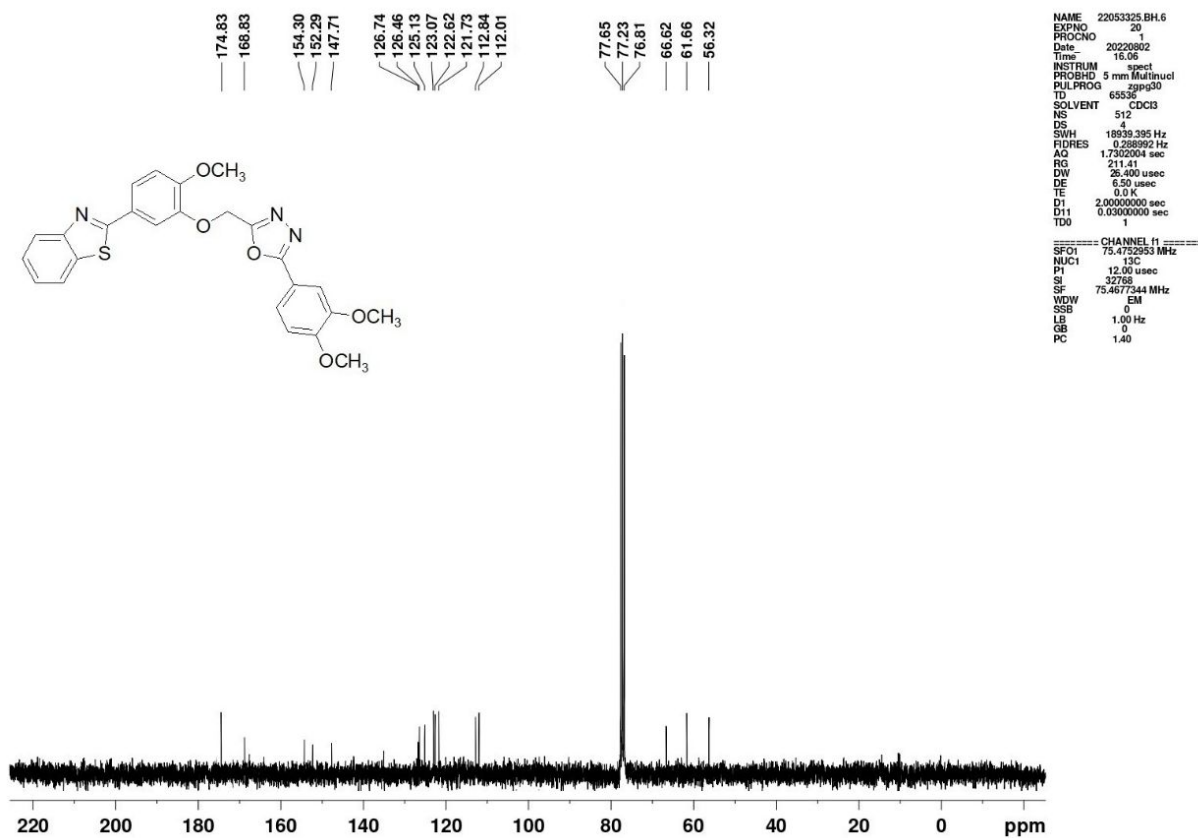

Figure 20:  $^{13}\text{C}$ -NMR spectra of compound **6f**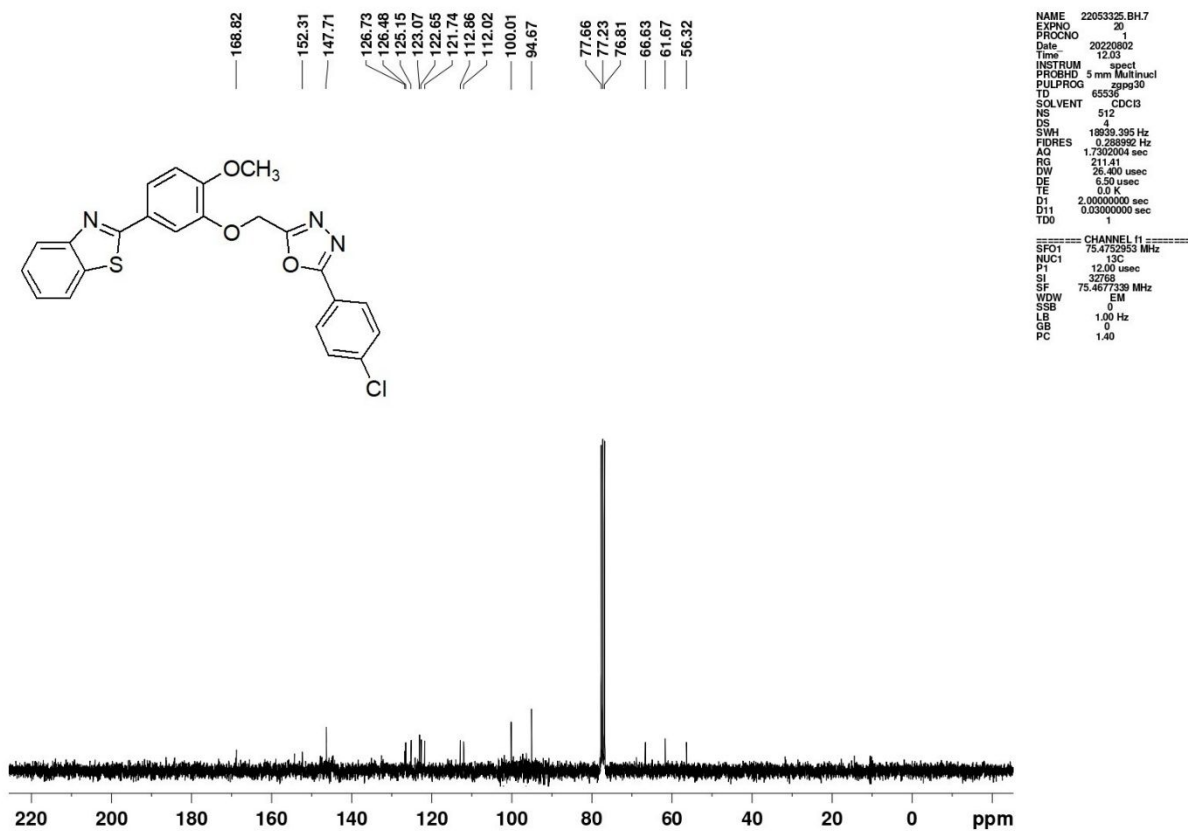Figure 21:  $^{13}\text{C}$ -NMR spectra of compound **6g**



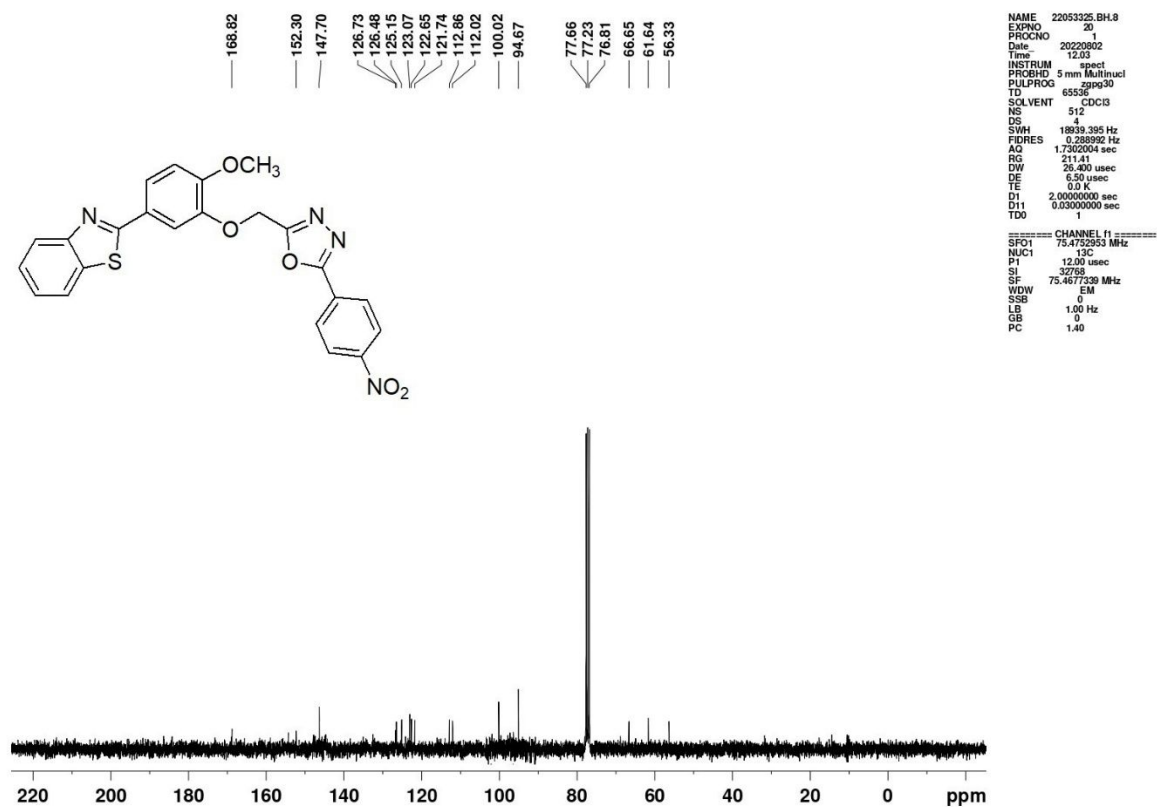

Figure 22: <sup>13</sup>C-NMR spectra of compound 6h

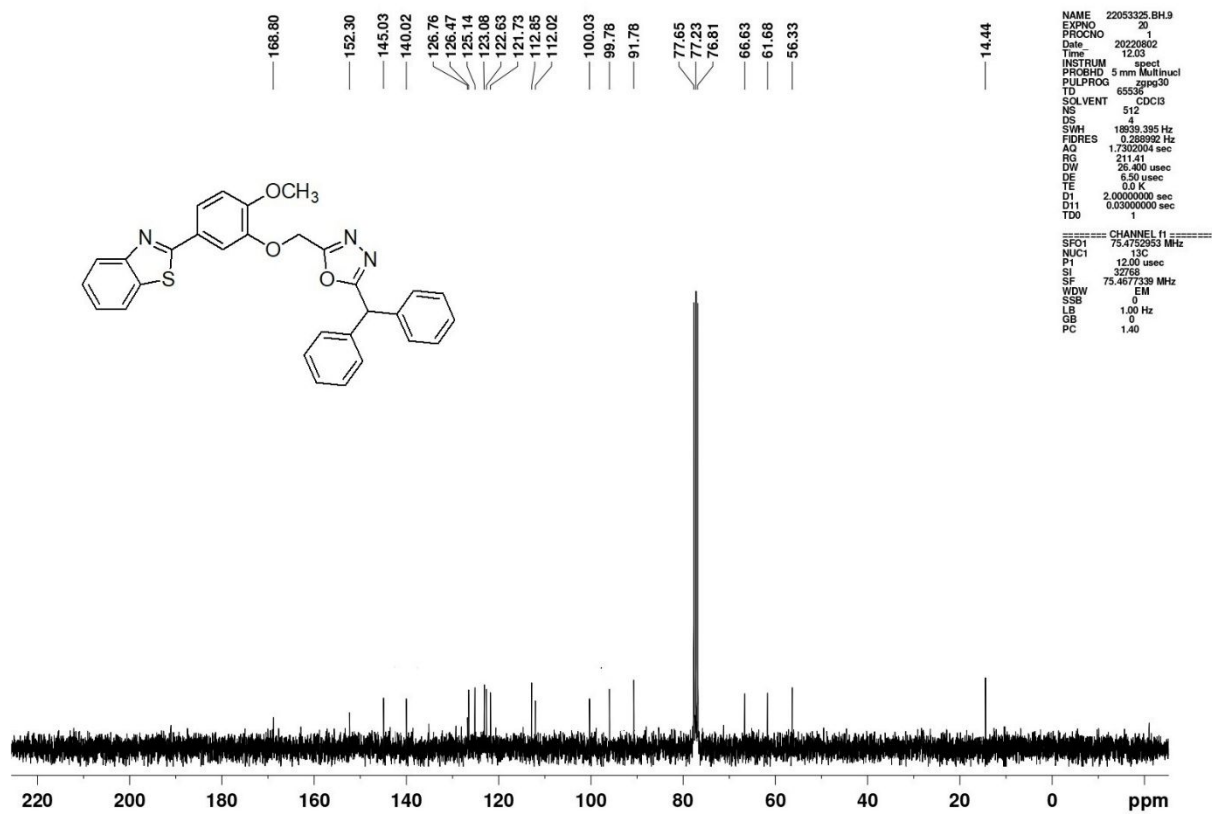

Figure 23:  $^{13}\text{C}$ -NMR spectra of compound 6i

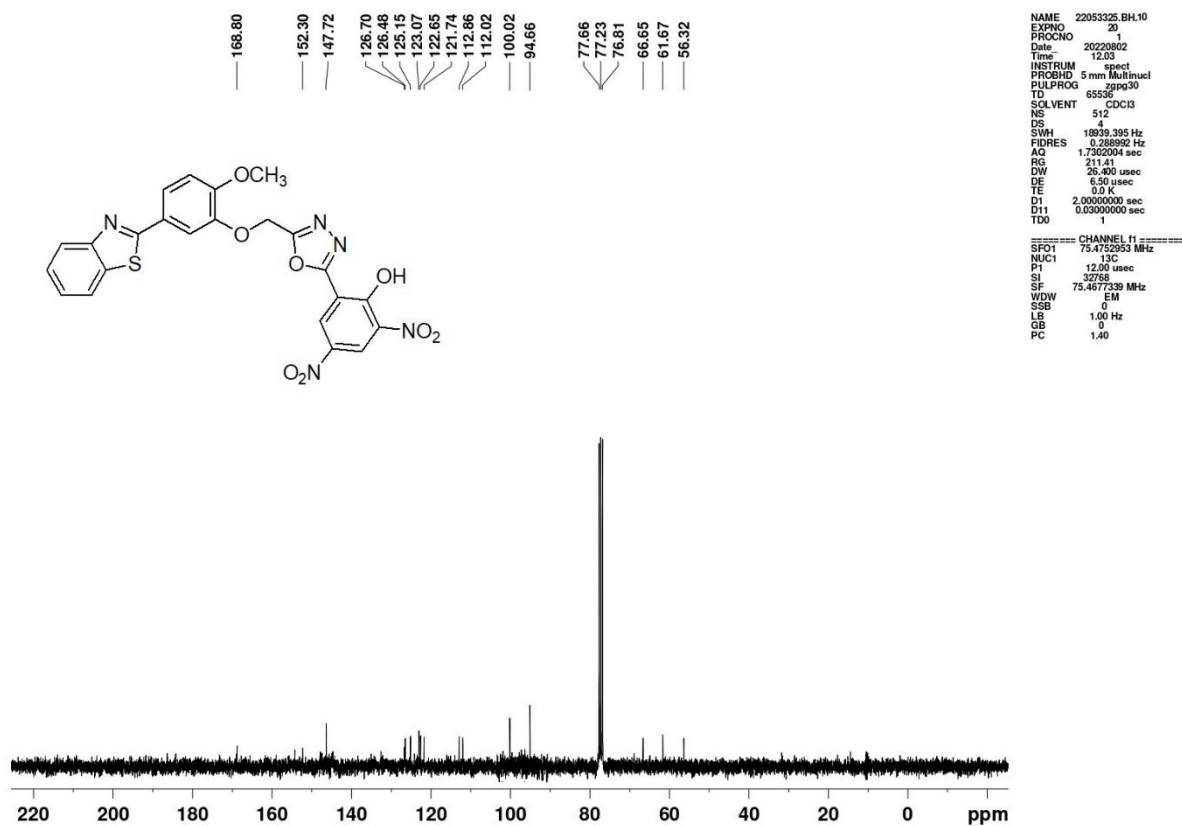Figure 24:  $^{13}\text{C}$ -NMR spectra of compound 6j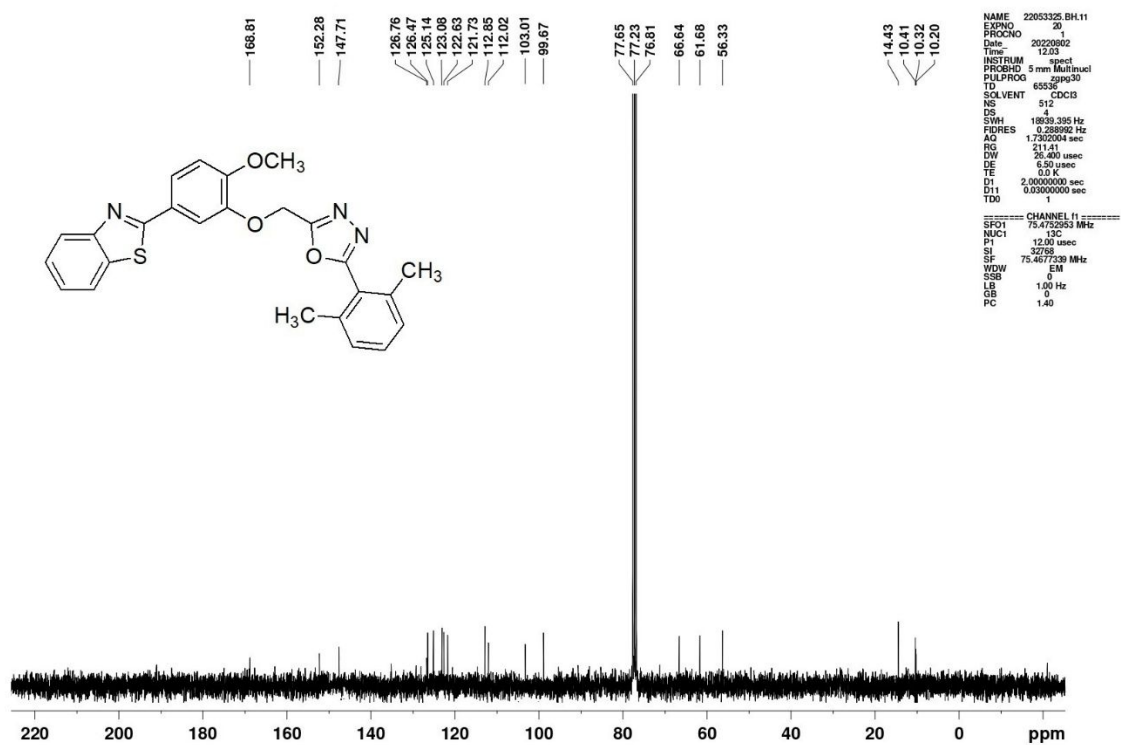

Figure 25:  $^{13}\text{C}$ -NMR spectra of compound **6k**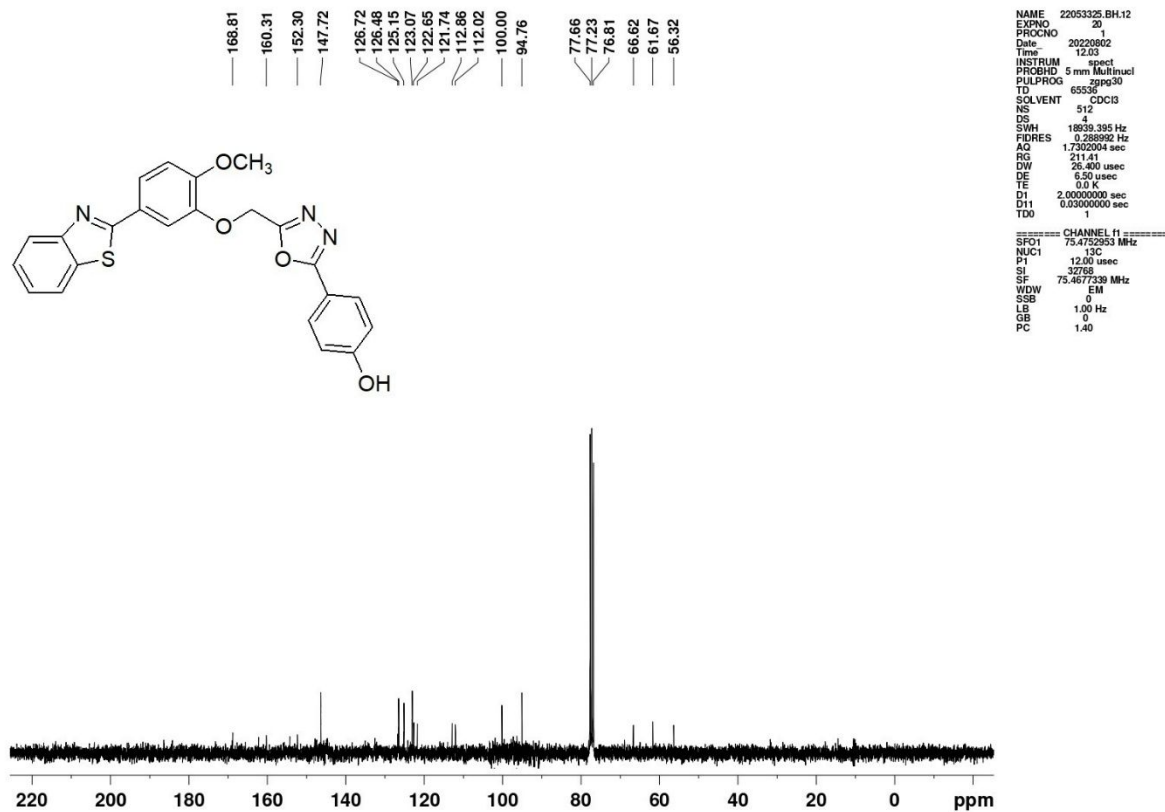Figure 26:  $^{13}\text{C}$ -NMR spectra of compound **6l**

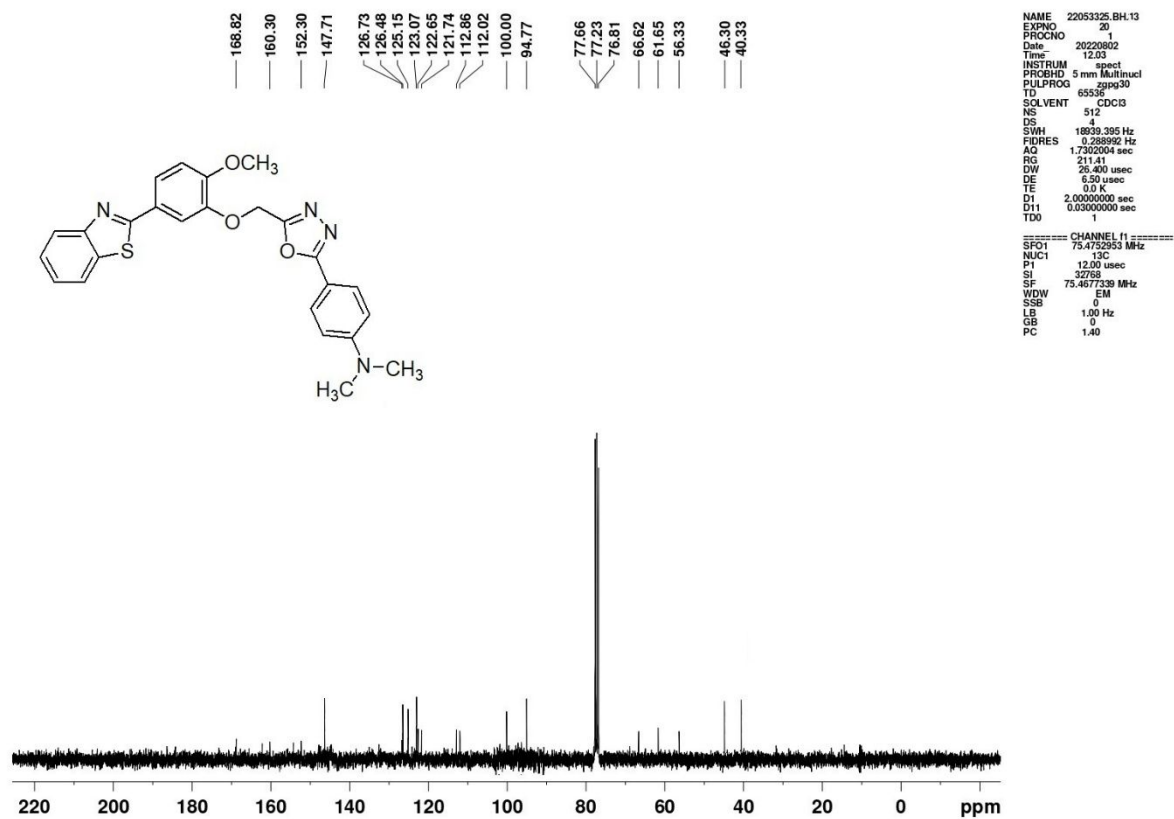

Figure 27:  $^{13}\text{C}$ -NMR spectra of compound 6m

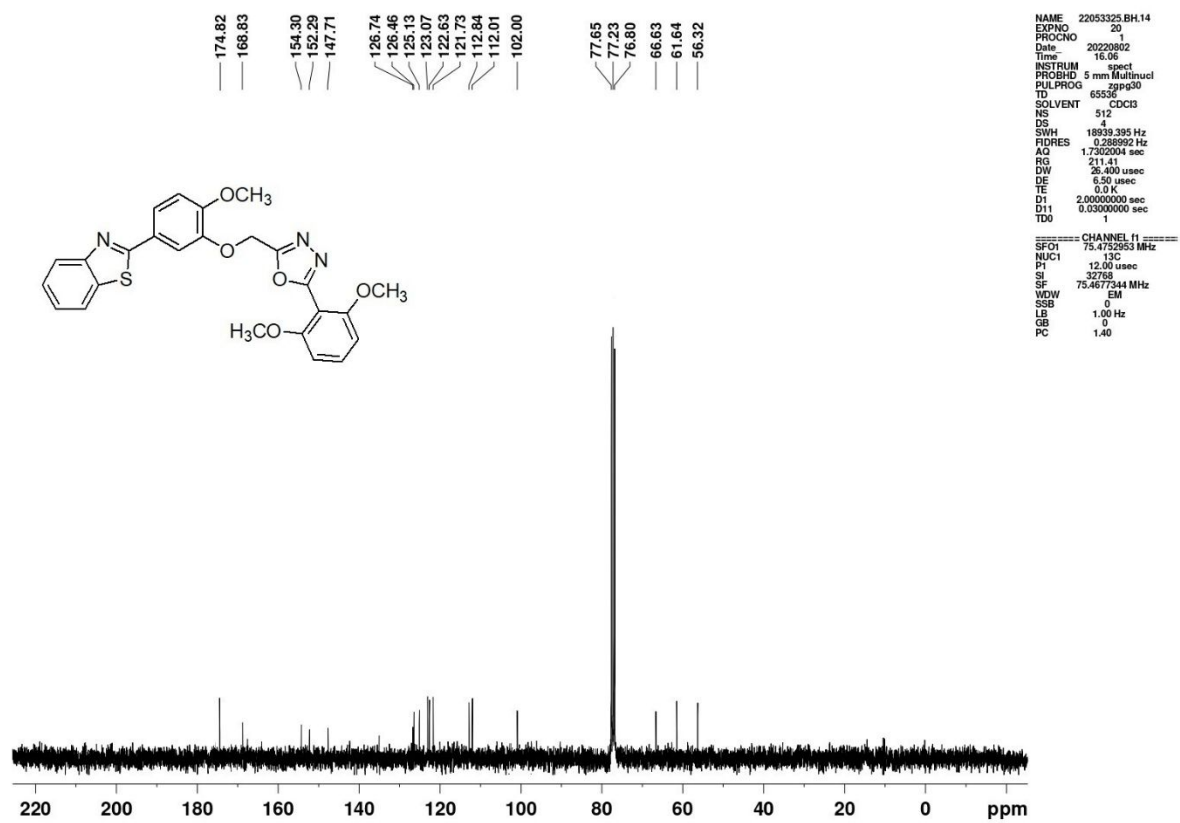

Figure 28: <sup>13</sup>C-NMR spectra of compound 6n

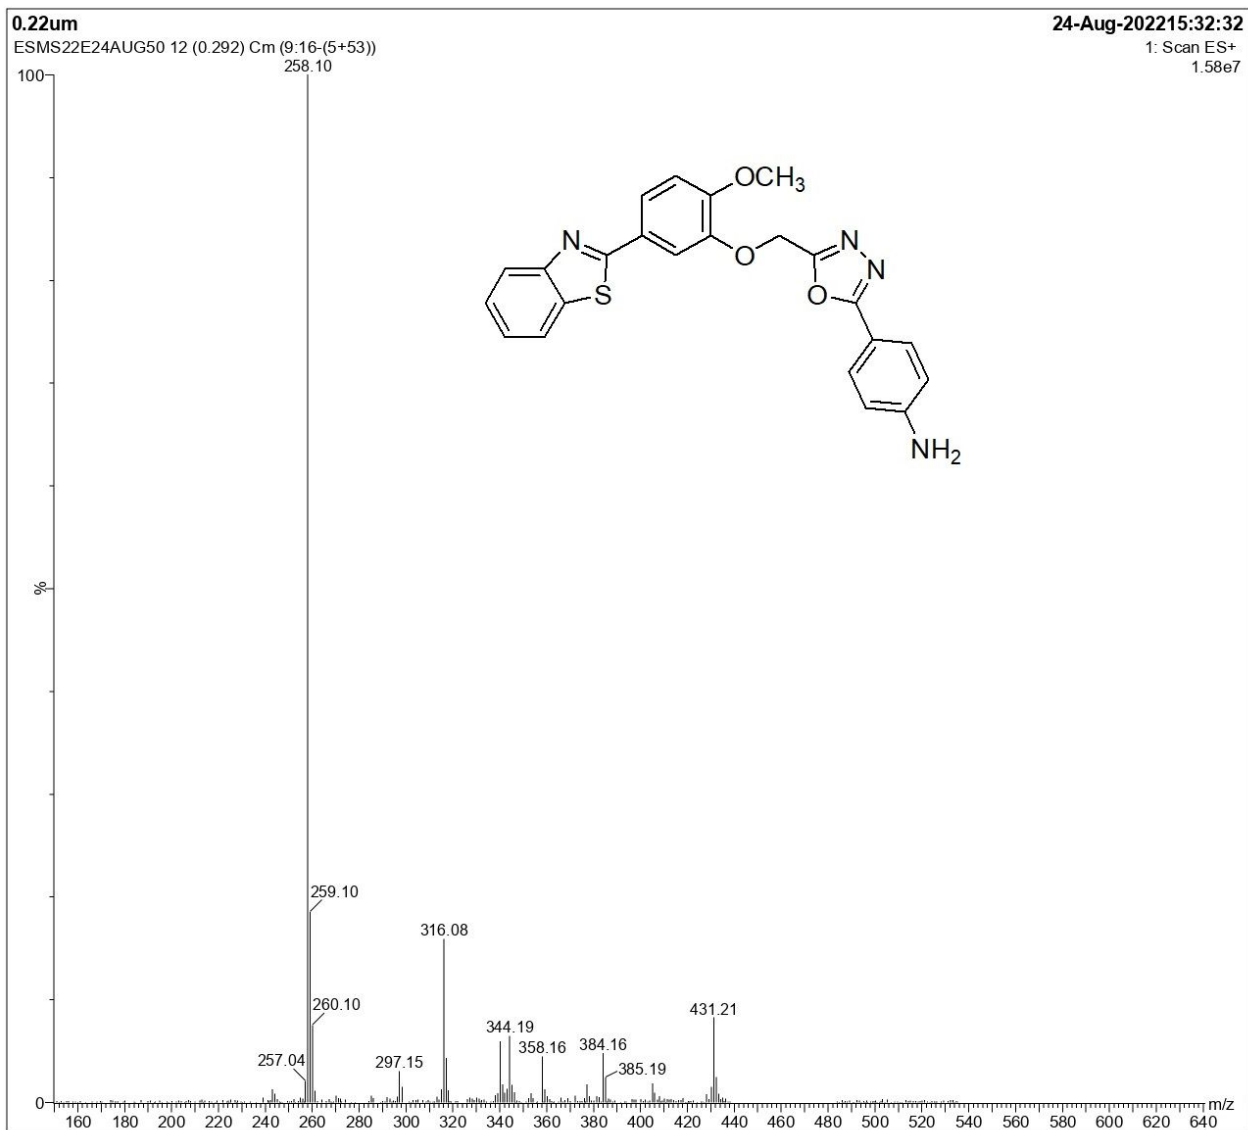

**Figure 29:** Mass spectra of compound **6a**

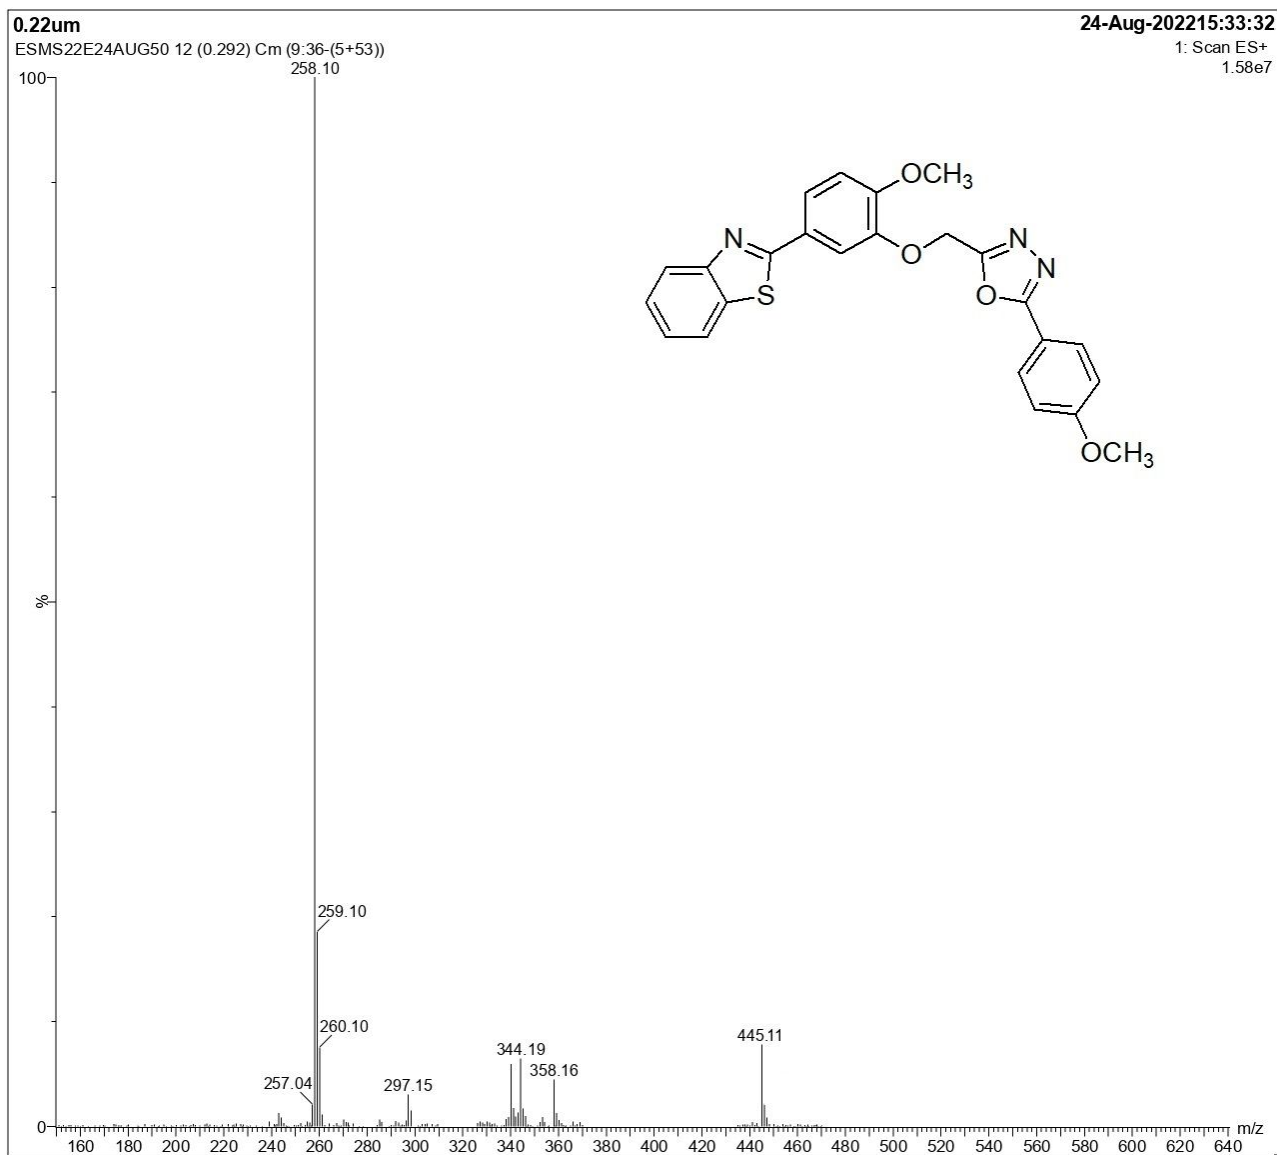

Figure 30: Mass spectra of compound **6b**



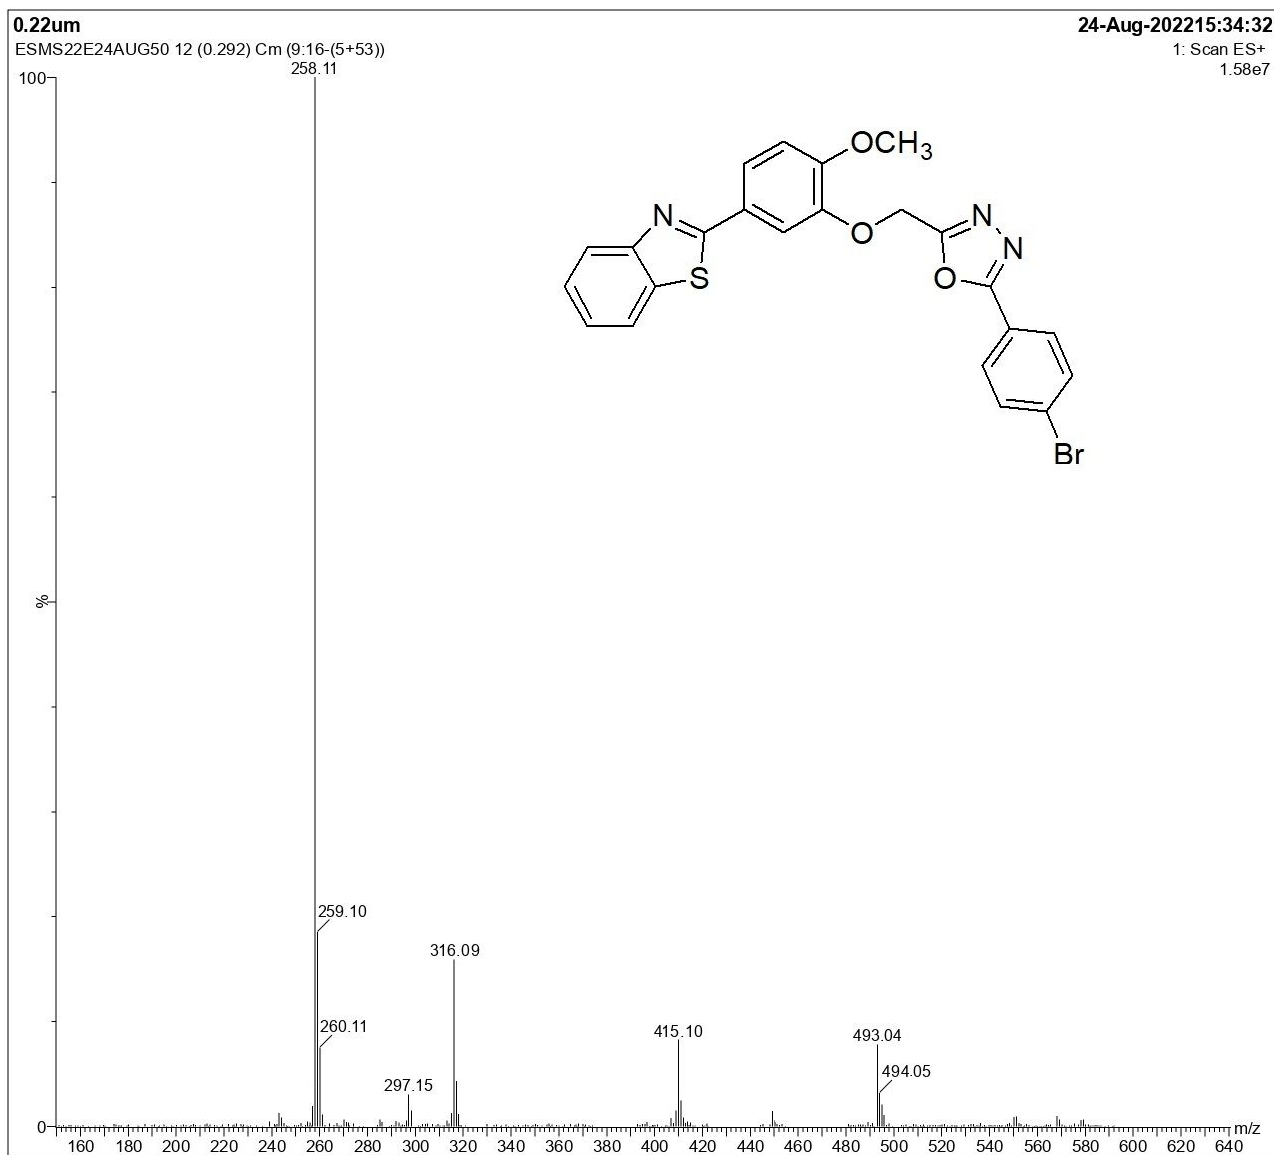

Figure 31: Mass spectra of compound 6c

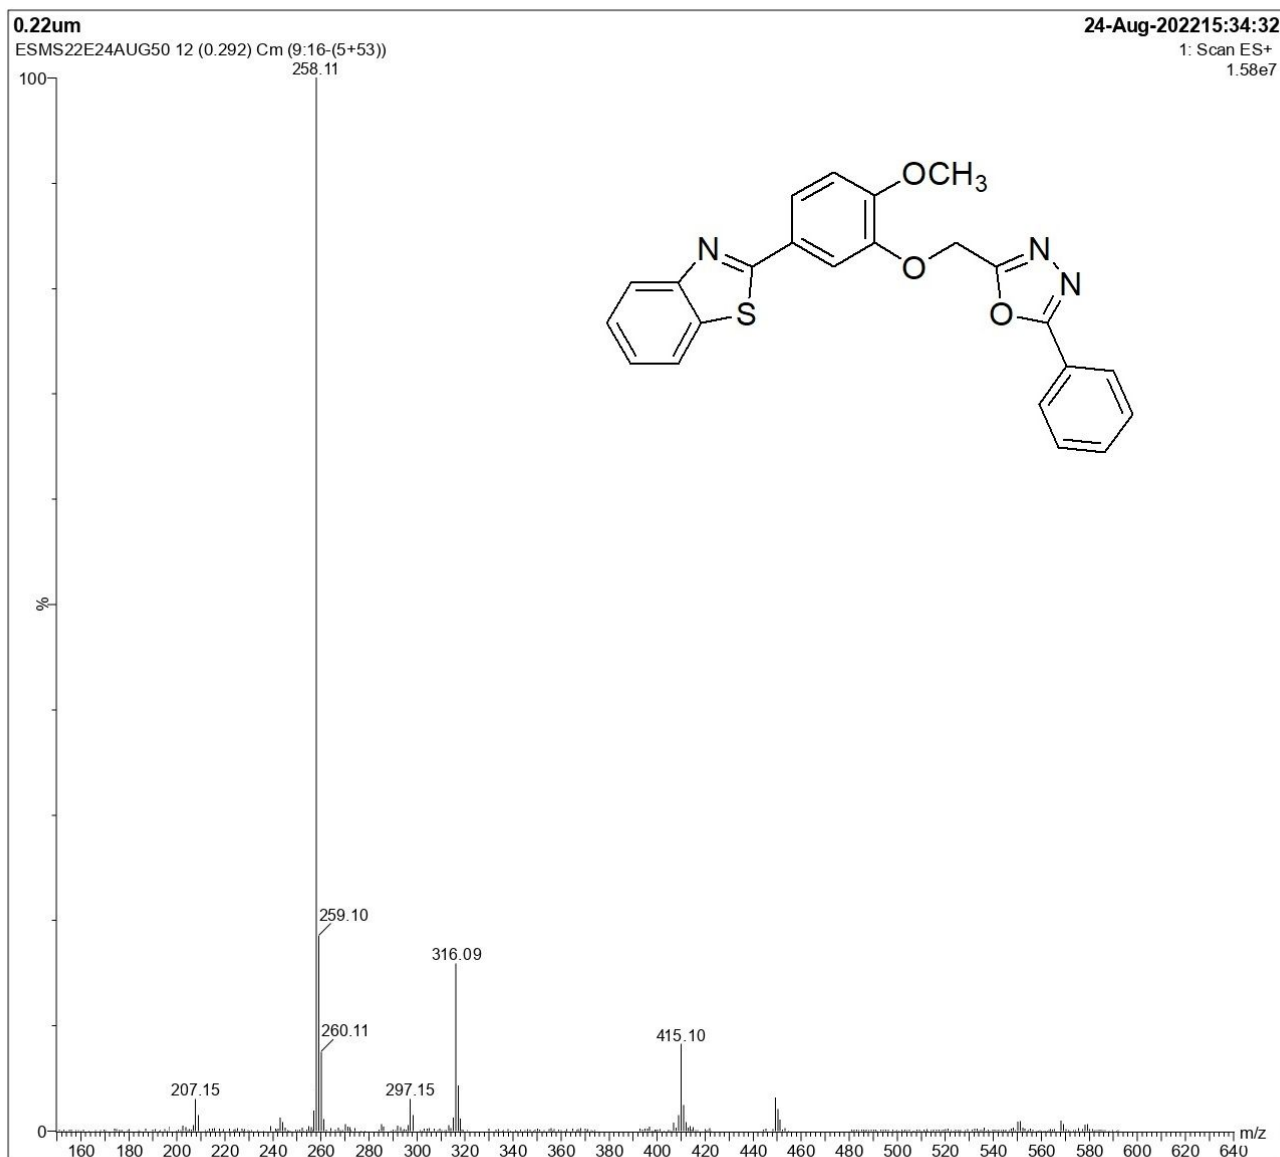

**Figure 32:** Mass spectra of compound **6d**

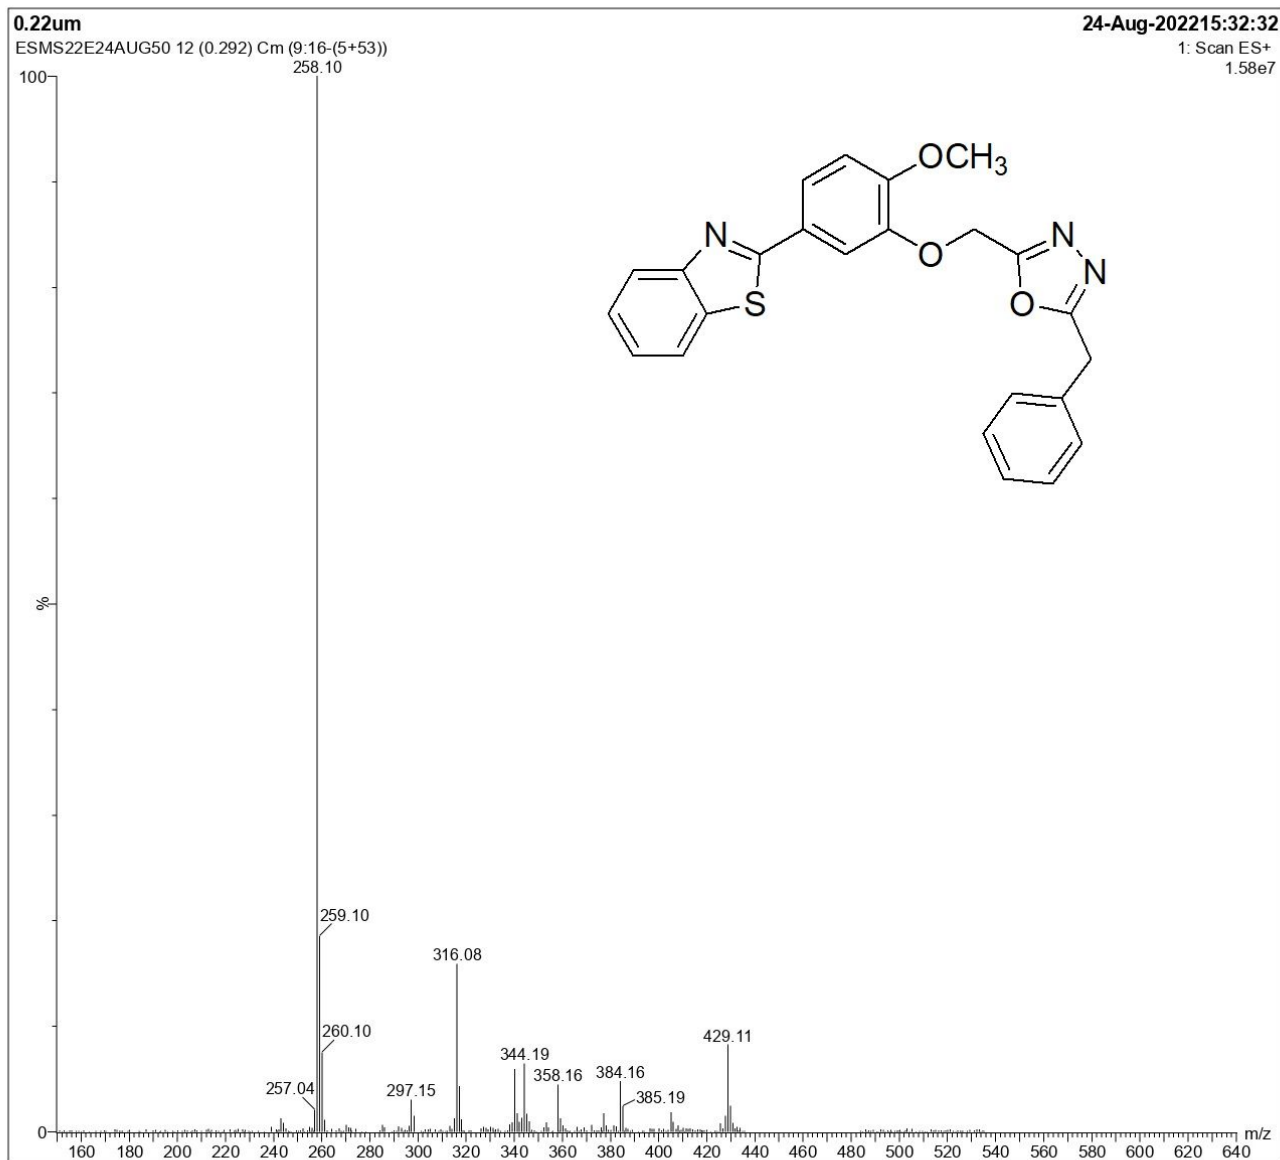

**Figure 33:** Mass spectra of compound **6e**

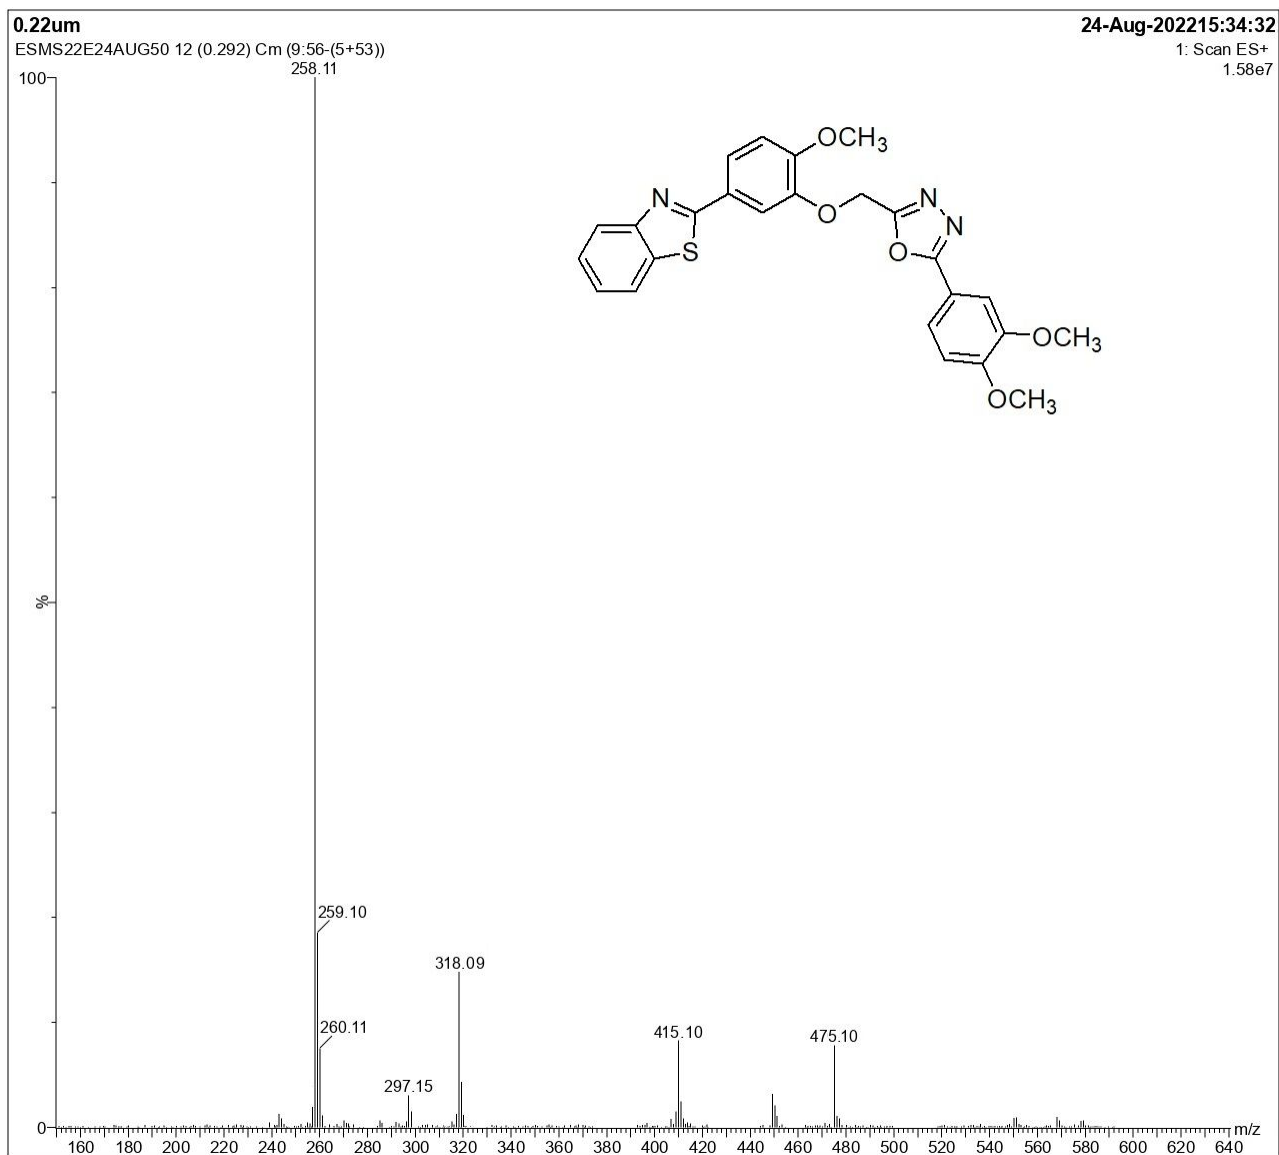

**Figure 34:** Mass spectra of compound 6f

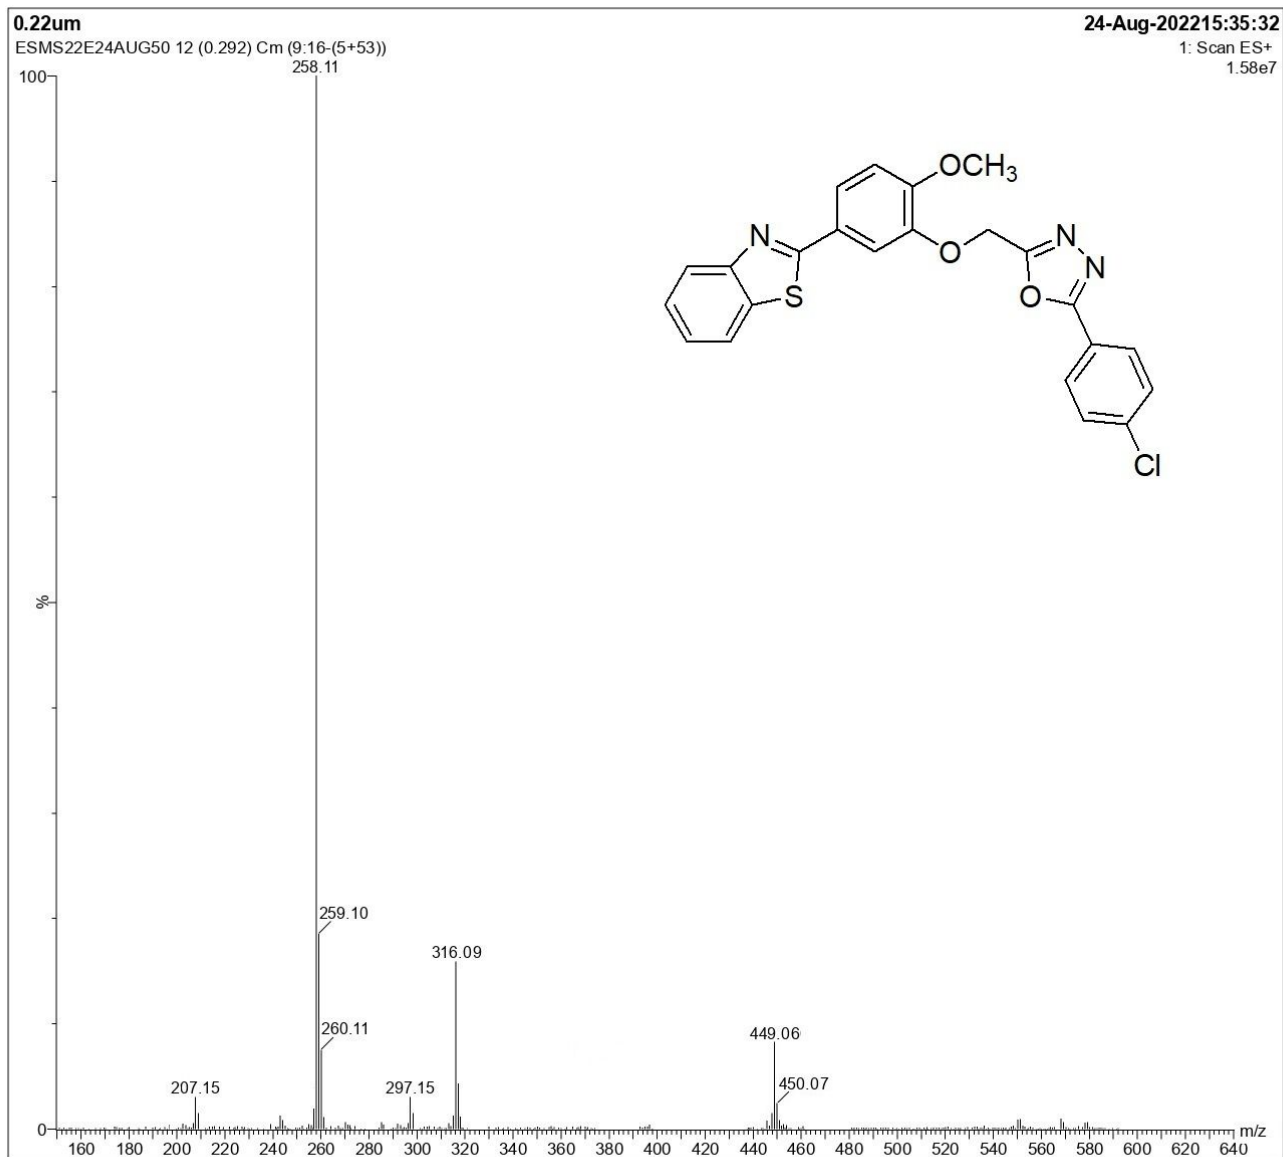

**Figure 35:** Mass spectra of compound **6g**

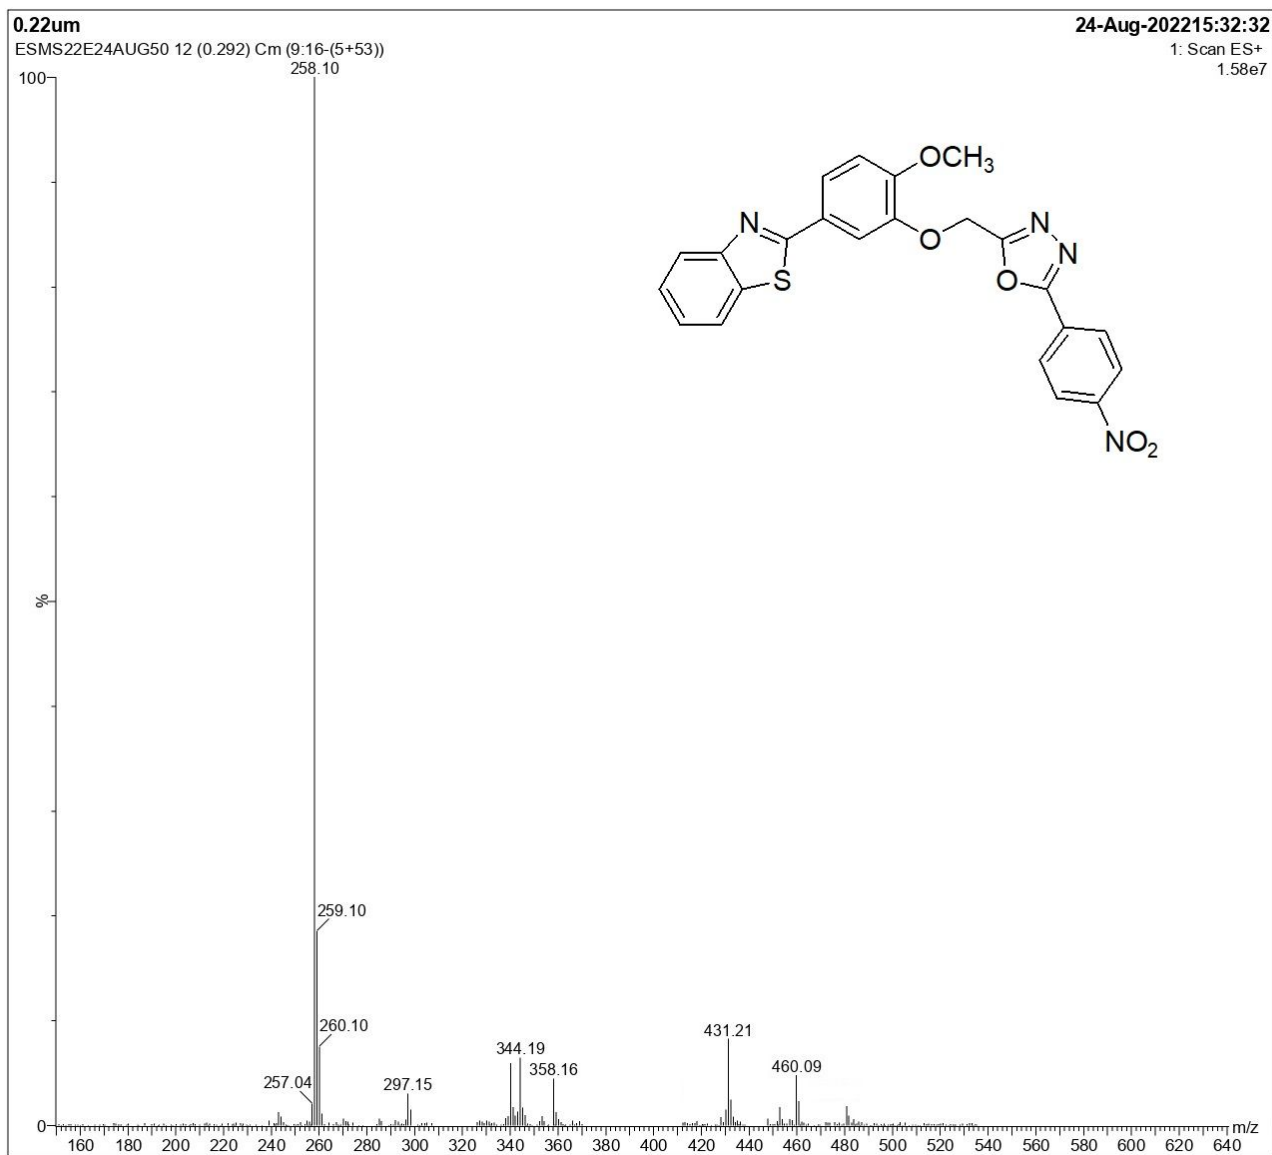

Figure 36: Mass spectra of compound 6h

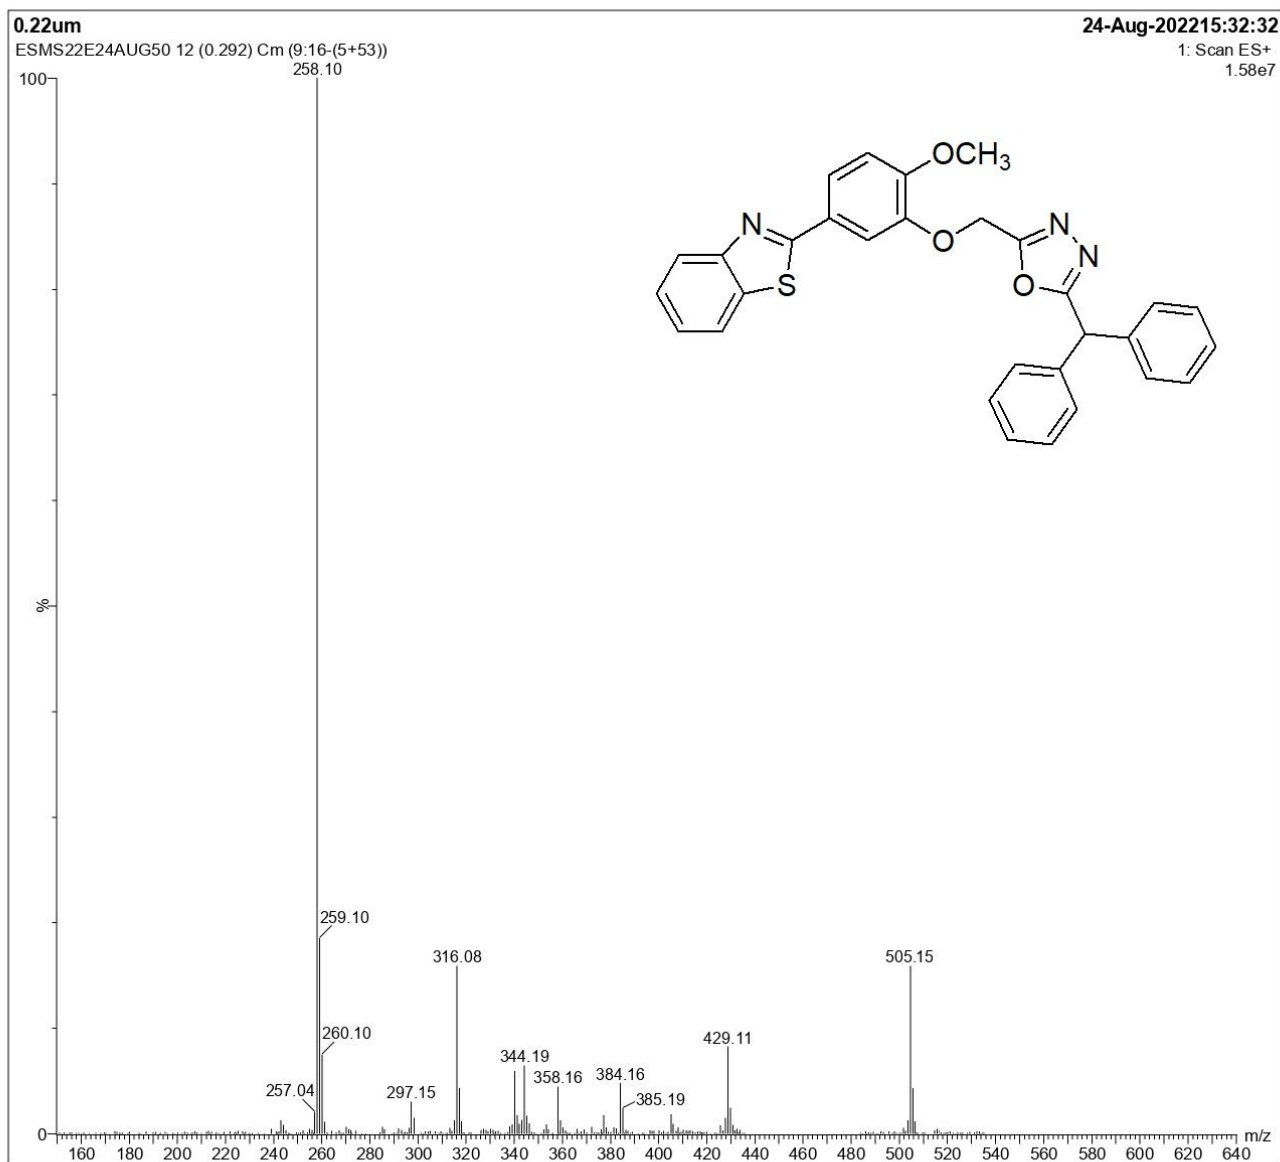

**Figure 37:** Mass spectra of compound 6i

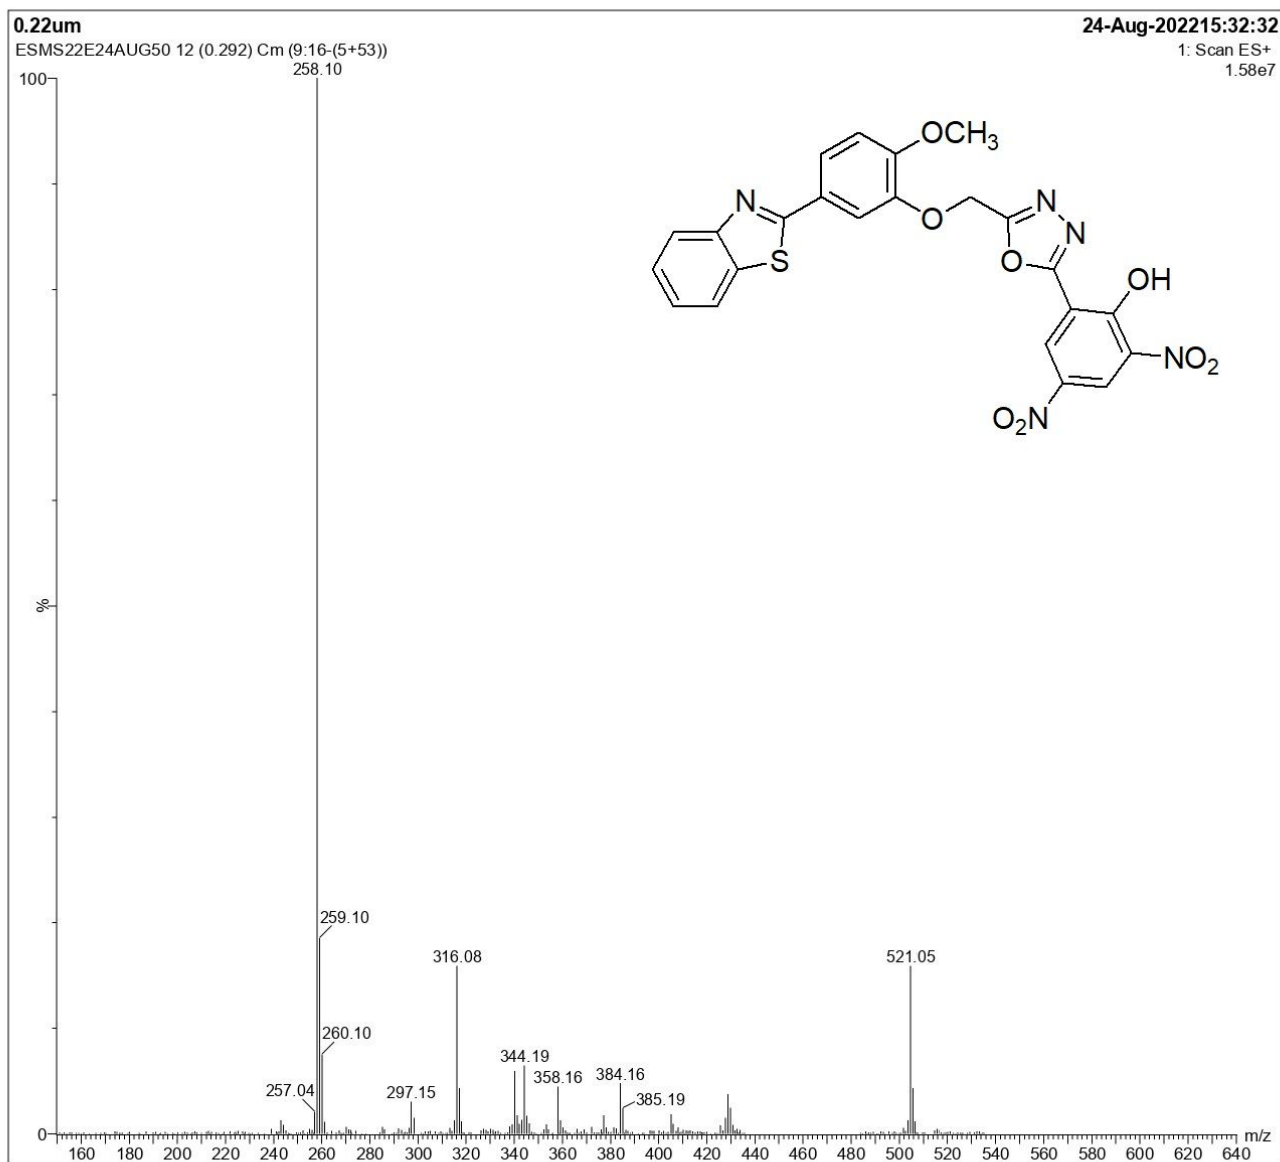

**Figure 38:** Mass spectra of compound 6j



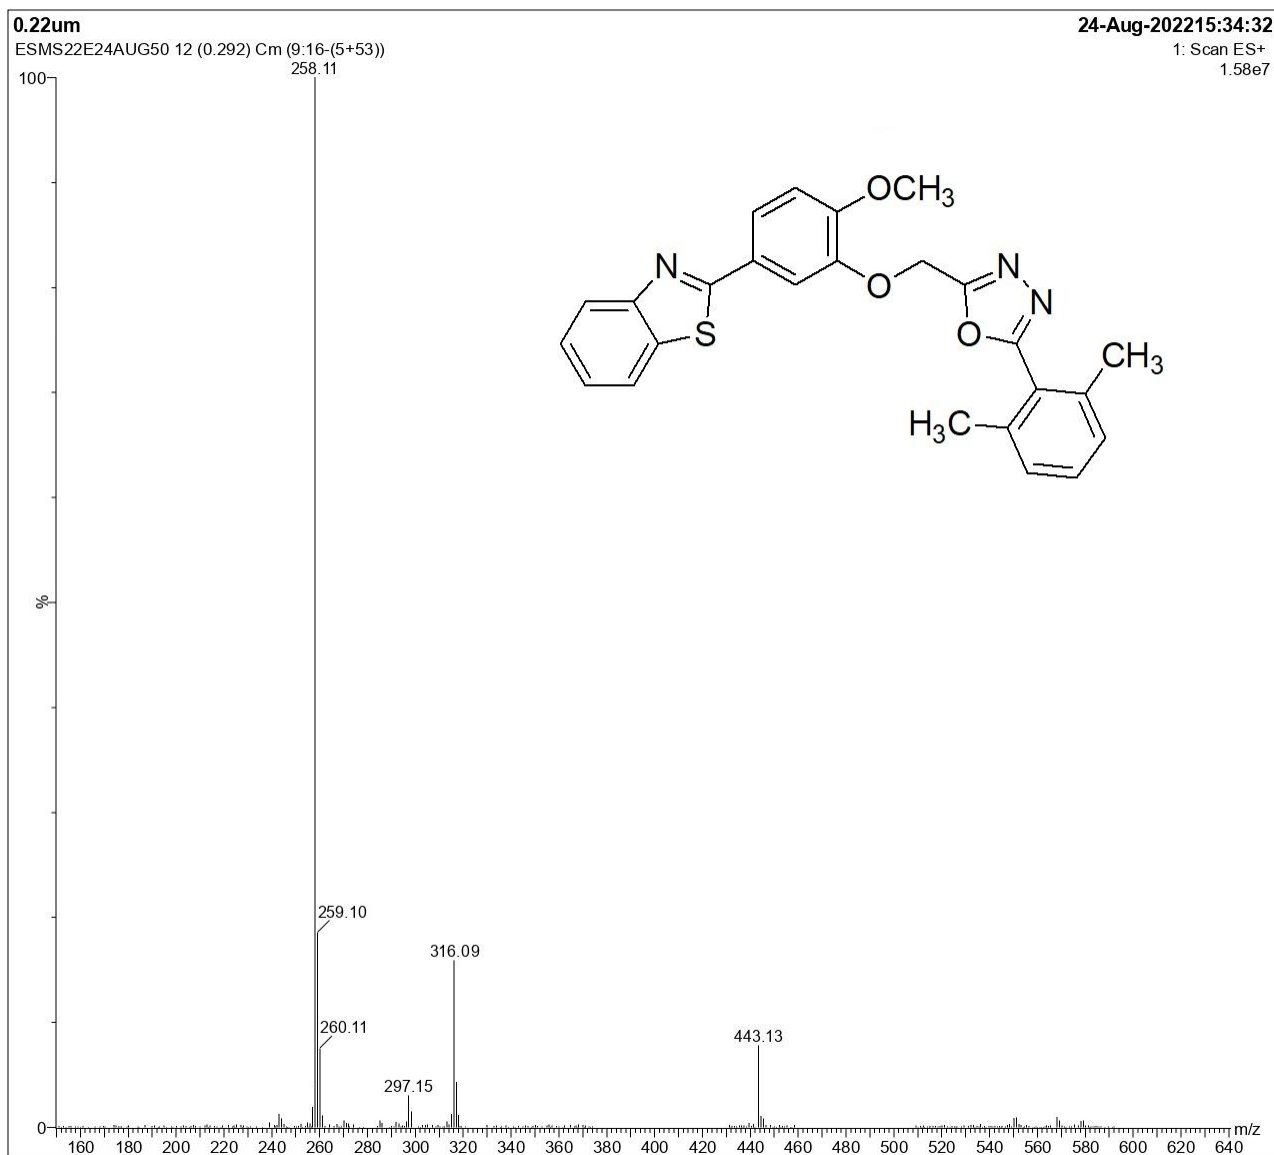

Figure 39: Mass spectra of compound 6k

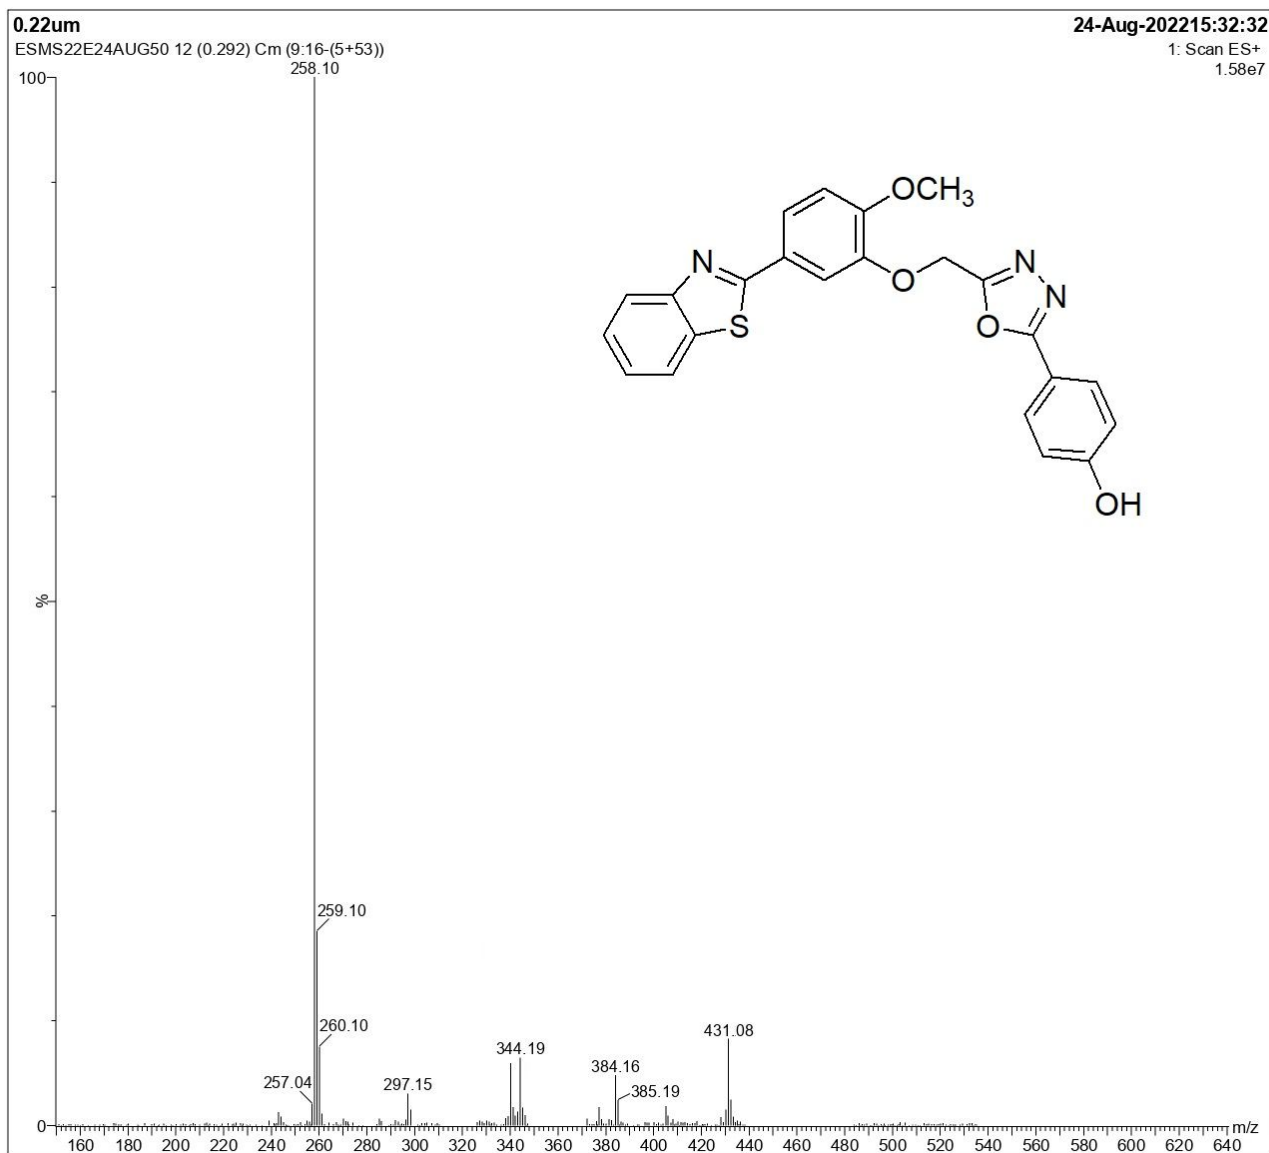

Figure 40: Mass spectra of compound 6l

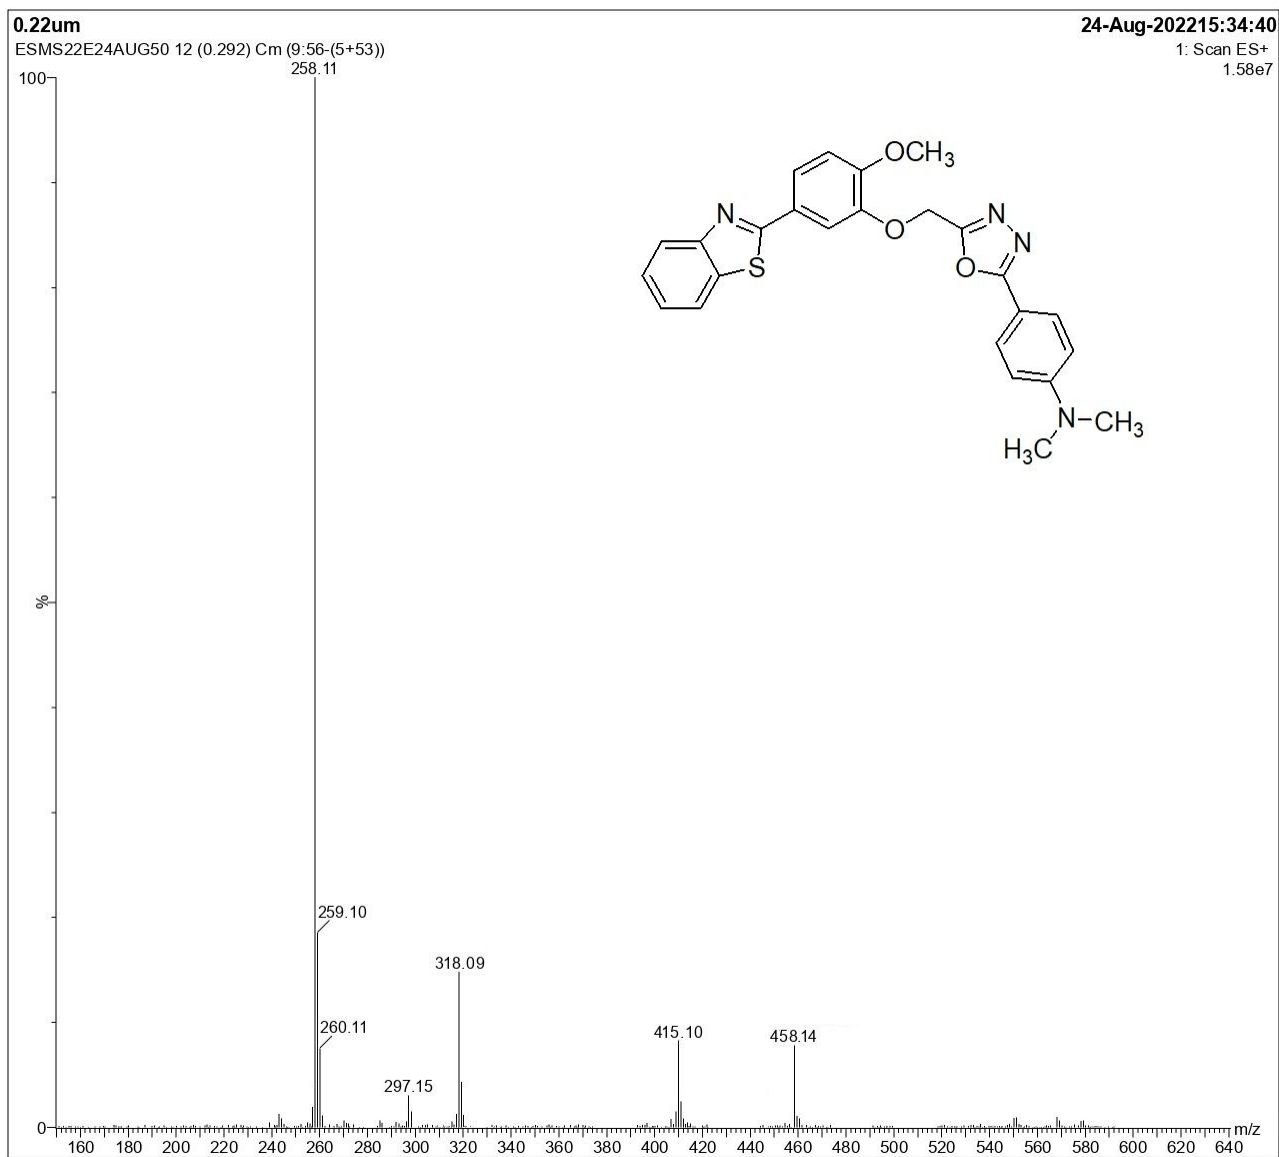

Figure 41: Mass spectra of compound 6m

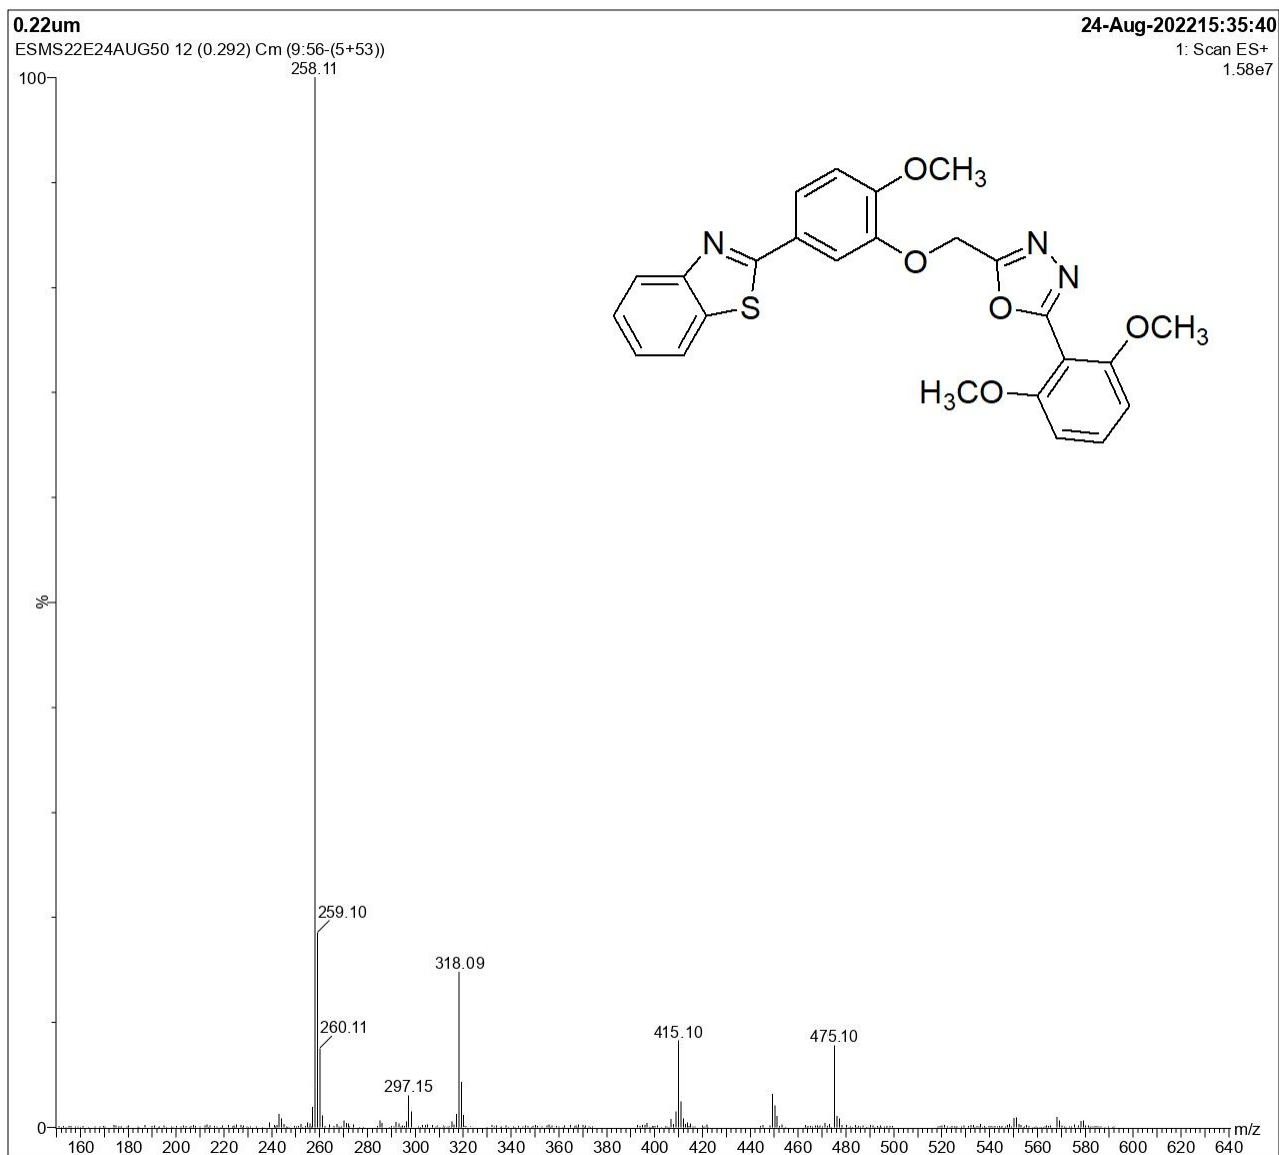

Figure 42: Mass spectra of compound 6n

| Sample Name   | Bharti (SAIF22053325) | Position    | Vial 62     | Instrument Name | Instrument 1 | User Name              | Some Ions Missed     |
|---------------|-----------------------|-------------|-------------|-----------------|--------------|------------------------|----------------------|
| Inj Vol       | 1                     | InjPosition |             | SampleType      | Sample       | IRM Calibration Status | 5/25/2022 6:29:11 PM |
| Data Filename | BH-6.d                | ACQ Method  | ISOCRATIC.m | Comment         |              | Acquired Time          |                      |

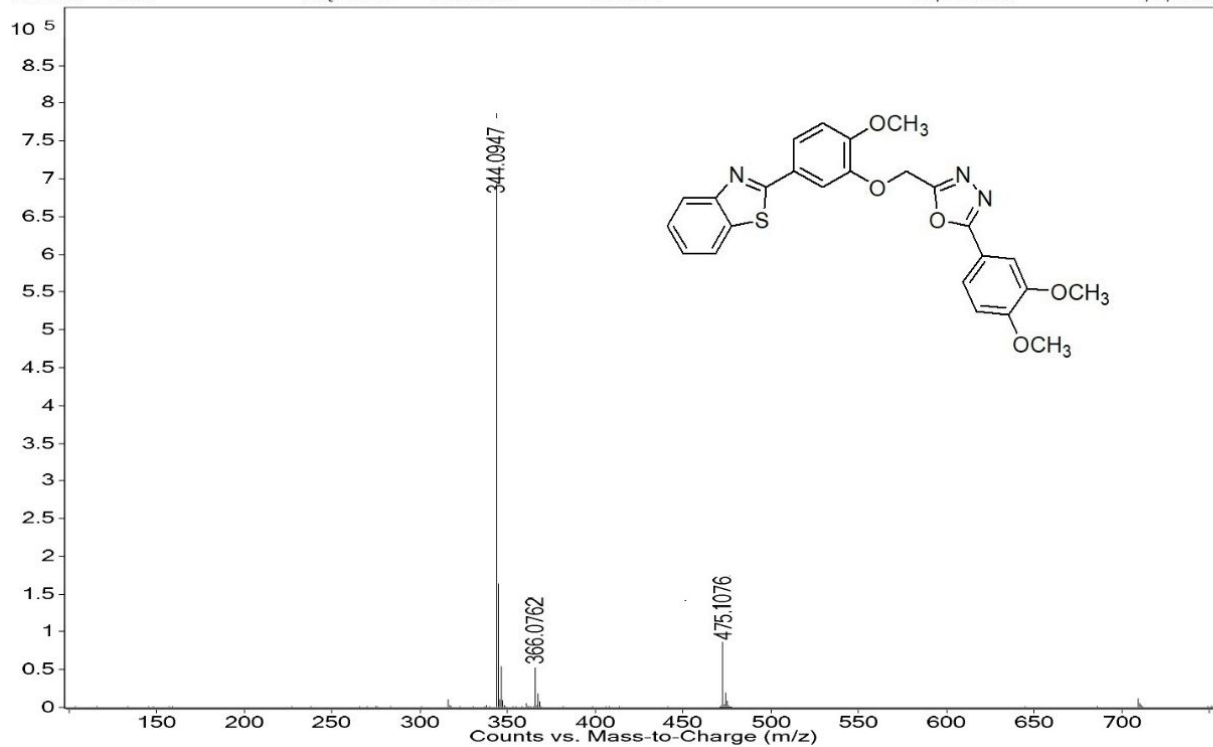

**Figure 43: HRMS Spectra of compound 6f**

| Sample Name   | Bharti (SAIF22053325) | Position    | Vial 62     | Instrument Name | Instrument 1 | User Name              | Some Ions Missed     |
|---------------|-----------------------|-------------|-------------|-----------------|--------------|------------------------|----------------------|
| Inj Vol       | 1                     | InjPosition |             | SampleType      | Sample       | IRM Calibration Status | 5/25/2022 6:29:11 PM |
| Data Filename | BH.d                  | ACQ Method  | ISOCRATIC.m | Comment         |              | Acquired Time          |                      |

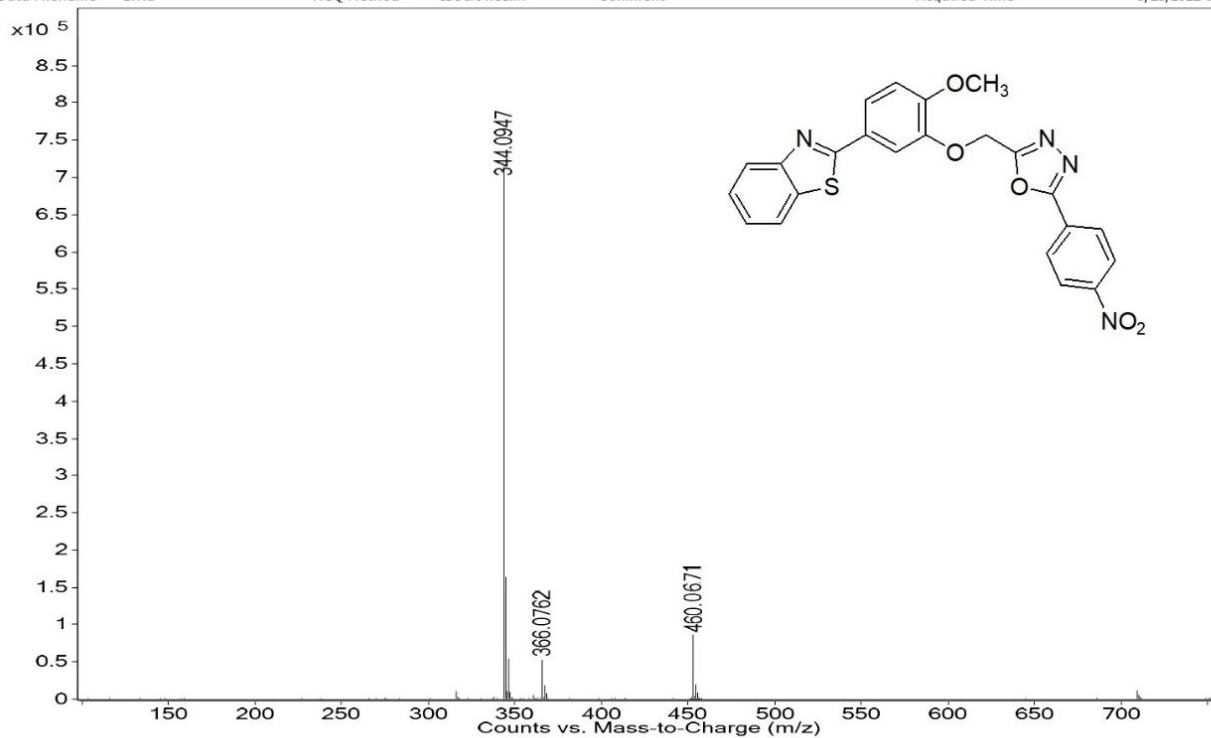

**Figure 44: HRMS Spectra of compound 6h**

|               |                      |             |             |                 |              |                        |                      |
|---------------|----------------------|-------------|-------------|-----------------|--------------|------------------------|----------------------|
| Sample Name   | Bharti (SAIF2053325) | Position    | Vial 62     | Instrument Name | Instrument 1 | User Name              |                      |
| Inj Vol       | 1                    | InjPosition |             | SampleType      | Sample       | IRM Calibration Status | Some Ions Missed     |
| Data Filename | BH-10.d              | ACQ Method  | ISOCRATIC.m | Comment         |              | Acquired Time          | 5/25/2022 6:29:19 PM |

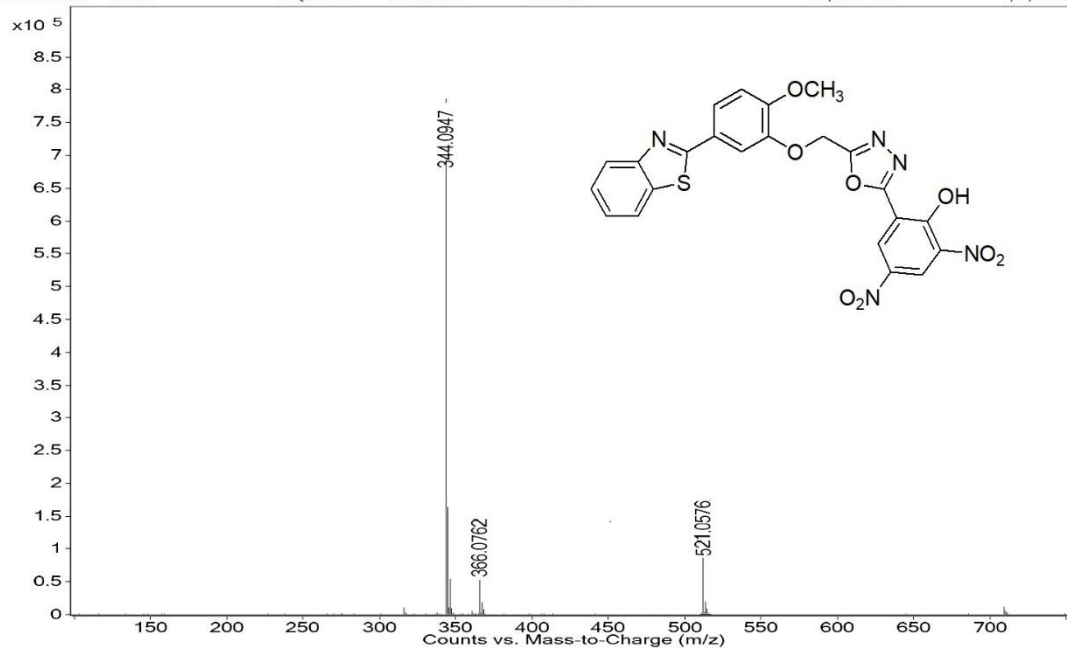

Figure 45: HRMS spectra of compound 6j

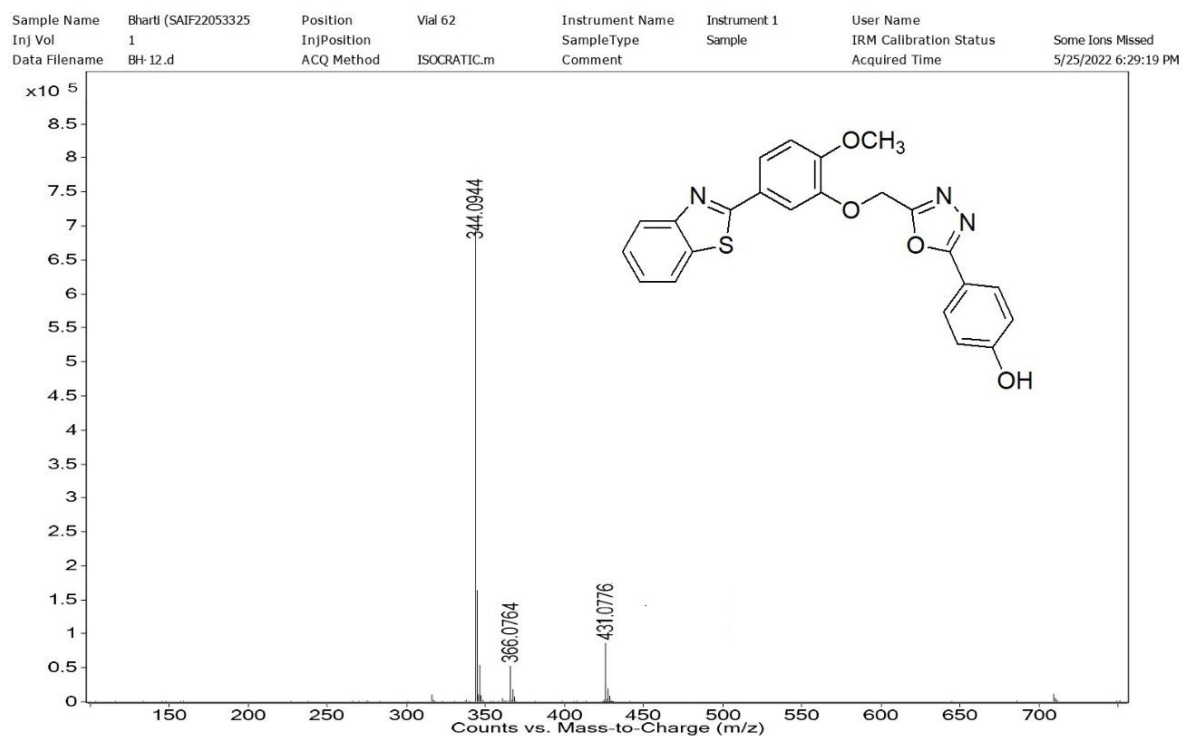

**Figure 46:** HRMS spectra of compound **6l**

**Table 4.** Molecular Properties and ADME profile of synthesized compounds (**6a-n**)

| Compound    | % ABS  | TPSA  | n-ROTB | MW         | nA<br>OH<br>NH | nA<br>O<br>N | miLo<br>gP | Viol<br>atio<br>n | BBB<br>permea<br>bility | CNS<br>perme<br>ability | Tota<br>l<br>clear<br>ance | Rena<br>l<br>OCT<br>2<br>subst<br>rate | Wat<br>er<br>solu<br>bility |
|-------------|--------|-------|--------|------------|----------------|--------------|------------|-------------------|-------------------------|-------------------------|----------------------------|----------------------------------------|-----------------------------|
| <b>Rule</b> |        |       |        | <500       | <5             | <1<br>0      | <5         | <1                |                         |                         |                            |                                        |                             |
| <b>6a</b>   | 100    | 96.31 | 6      | 430.4<br>9 | 2              | 7            | 4.03       | 0                 | -1.217                  | -2.184                  | 0.00<br>9                  | No                                     | -4.09                       |
| <b>6b</b>   | 96.722 | 79.52 | 7      | 445.5<br>0 | 0              | 7            | 5.01       | 1                 | -1.268                  | -3.256                  | 0.25<br>2                  | No                                     | -3.86                       |
| <b>6c</b>   | 94.722 | 70.28 | 6      | 494.3<br>7 | 0              | 6            | 5.76       | 1                 | -1.216                  | -1.872                  | 0.07                       | No                                     | -4.30                       |

|                           |        |            |   |            |   |    |      |   |        |        |           |    |       |
|---------------------------|--------|------------|---|------------|---|----|------|---|--------|--------|-----------|----|-------|
| <b>6d</b>                 | 96.255 | 70.28      | 6 | 415.4<br>7 | 0 | 6  | 4.95 | 0 | -1.045 | -2.184 | 0.21<br>4 | No | -3.64 |
| <b>6e</b>                 | 98.036 | 70.28      | 7 | 429.5<br>0 | 0 | 6  | 4.55 | 0 | -1.015 | -2.215 | 0.30<br>4 | No | -4.13 |
| <b>6f</b>                 | 96.456 | 88.75      | 8 | 475.5<br>3 | 0 | 8  | 4.60 | 0 | -1.48  | -3.494 | 0.44<br>3 | No | -3.76 |
| <b>6g</b>                 | 94.862 | 70.28      | 6 | 449.9<br>2 | 0 | 6  | 5.63 | 1 | -1.208 | -1.895 | 0.09<br>1 | No | -4.29 |
| <b>6h</b>                 | 100    | 116.1<br>1 | 7 | 460.4<br>7 | 0 | 9  | 4.91 | 0 | -1.564 | -2.222 | 0.24      | No | -4.26 |
| <b>6i</b>                 | 98.83  | 70.28      | 8 | 505.6<br>0 | 0 | 6  | 5.75 | 2 | -1.094 | -2.013 | 0.24<br>9 | No | -3.22 |
| <b>6j</b>                 | 93.534 | 182.1<br>6 | 8 | 521.4<br>7 | 1 | 13 | 4.51 | 2 | -1.832 | -3.548 | 0.52<br>8 | No | -3.52 |
| <b>6k</b>                 | 96.993 | 70.28      | 6 | 443.5<br>3 | 0 | 6  | 5.75 | 1 | -1.035 | -1.852 | 0.12<br>8 | No | -4.31 |
| <b>6l</b>                 | 97.083 | 73.52      | 7 | 458.5<br>4 | 0 | 7  | 5.06 | 1 | -1.193 | -2.102 | 0.19<br>7 | No | -4.11 |
| <b>6m</b>                 | 93.566 | 90.51      | 6 | 431.4<br>7 | 1 | 7  | 4.47 | 0 | -1.265 | -3.139 | 0.10<br>3 | No | -4.32 |
| <b>6n</b>                 | 97.508 | 88.75      | 8 | 475.5<br>3 | 0 | 8  | 4.97 | 0 | -1.49  | -3.499 | 0.53<br>6 | No | -3.48 |
| <b>Phenytoi<br/>n</b>     | 95.329 | 58.20      | 2 | 252.2<br>7 | 2 | 4  | 2.18 | 0 | -0.048 | -2.299 | 0.27<br>7 | No | -3.64 |
| <b>Phenoba<br/>rbital</b> | 63.936 | 75.27      | 3 | 246.2<br>7 | 2 | 5  | 1.57 | 0 | -0.06  | -2.554 | 0.20<br>9 | No | -2.26 |

**Table 5.** Binding energies and no. of hydrogen bonds of synthesized derivatives (**6a**, **6d-h**, **6j-l**, and **6n**), phenytoin, and phenobarbital on two different receptors in (Kcal/mol).

| Compound<br>Name | 2coj              |                       |                         | 5ioy              |                       |                     |
|------------------|-------------------|-----------------------|-------------------------|-------------------|-----------------------|---------------------|
|                  | Binding<br>energy | No. of Hydrogen Bonds |                         | Binding<br>energy | No. of Hydrogen Bonds |                     |
|                  |                   | Conventional          | Carbon-<br>Hydroge<br>n |                   | Conventional          | Carbon-<br>Hydrogen |



|                      |        |   |   |       |   |   |
|----------------------|--------|---|---|-------|---|---|
| <b>6a</b>            | -8.78  | 1 | 0 | -7.79 | 2 | 1 |
| <b>6b</b>            | -8.29  | 3 | 0 | -6.68 | 2 | 1 |
| <b>6c</b>            | -8.1   | 0 | 0 | -7.54 | 0 | 0 |
| <b>6d</b>            | -6.94  | 1 | 0 | -6.33 | 2 | 2 |
| <b>6e</b>            | -7.74  | 0 | 0 | -7.96 | 1 | 3 |
| <b>6f</b>            | -7.85  | 4 | 1 | -7.17 | 3 | 2 |
| <b>6g</b>            | -7.5   | 1 | 1 | -7.48 | 2 | 0 |
| <b>6h</b>            | -10.31 | 4 | 2 | -7.49 | 3 | 2 |
| <b>6i</b>            | -8.01  | 0 | 0 | -6.86 | 1 | 1 |
| <b>6j</b>            | -8.57  | 4 | 1 | -7.05 | 2 | 2 |
| <b>6k</b>            | -8.86  | 0 | 0 | -6.47 | 1 | 2 |
| <b>6l</b>            | -8.81  | 0 | 0 | -7.47 | 2 | 0 |
| <b>6m</b>            | -8.06  | 2 | 2 | -7.10 | 0 | 2 |
| <b>6n</b>            | -8.56  | 2 | 1 | -6.19 | 1 | 1 |
| <b>Phenytoin</b>     | -7.28  | 4 | 1 | -5.48 | 2 | 1 |
| <b>Phenobarbital</b> | -5.28  | 4 | 0 | -5.36 | 1 | 2 |
